# Supplementary material for: Creation of Secondary Porosity in Dolostones by Upwelling Basement Water in the Foreland of the Alpine Orogen
Source: Hindawi journal article supplement (doi:10.1155/2019/5210404), 2019-03-24
Supplement: f1 [file 5210404.f1.pdf]

## APPENDICES

### A1

Table A.1: Depth and thickness of the Trigonodus Dolomit and the Dolomit der Anhydritgruppe at all the wells investigated in this study.

| Well               | Depth TD<br>(m)          | Thickness TD<br>(m) | Depth DAG<br>(m)         | Thickness DAG<br>(m) | Basis for estimating<br>lithological boundaries |
|--------------------|--------------------------|---------------------|--------------------------|----------------------|-------------------------------------------------|
| Bözberg (BOZ)      | 58.4–96.0                | 37.6                | 136.0–148.8              | 12.8                 | DC                                              |
| Böttstein (BOE)    | 121.9–150.8              | 28.9                | 197.2–204.6              | 7.4                  | Nagra, 1985                                     |
| Siblingen (SIB)    | 177.0–207.8 <sup>3</sup> | 30.8                | 233.7–249.4              | 15.7                 | Nagra, 1992b                                    |
| Riniken (RIN)      | 616.0–652.4              | 36.4                | 688.5–698.5              | 10.0                 | Nagra, 1990                                     |
| Benken (BEN)       | 811.4–848.5              | 37.1                | 874.3–886.3              | 12.0                 | Nagra, 2001                                     |
| Weiach (WEI)       | 819.1–857.1              | 38.0                | 887.9–897.7              | 9.8                  | Nagra, 1989                                     |
| Schlattingen (SLA) | 1112.0–1145.3            | 33.3                | 1169.5–1179.1            | 9.6                  | Diamond et al., 2013                            |
| Schafisheim (SHA)  | 1228.3–1256.3            | 28.0                | 1287.7–1305.0            | 17.3                 | Nagra, 1992a                                    |
| Pfaffnau (PFA)     | ~ 1546–1575              | ~ 29.0              | ~ 1610–1622 <sup>1</sup> | ~ 12.0               | Büchi et al., 1965                              |
| Herdern (HER)      | 1990–2020                | 30.0                | ~ 2052–2062              | ~ 10.0               | This study.                                     |
| Berlingen (BER)    | ~ 2179–2191              | ~ 12.0              | ~ 2245–2257 <sup>1</sup> | ~ 12.0               | Büchi et al., 1965                              |
| Kreuzlingen (KRE)  | ~ 2415–2433 <sup>2</sup> | ~ 18.0              | ~ 2480–2492 <sup>1</sup> | ~ 12.0               | Büchi et al., 1965                              |
| Lindau (LIN)       | ~ 2225–2267 <sup>2</sup> | ~ 42.0              | ~ 2285–2297 <sup>1</sup> | ~ 12.0               | Büchi et al., 1965                              |

TD: Trigonodus Dolomit; DAG: Dolomit der Anhydritgruppe

DC: drill core

<sup>1</sup> Exact depth of base of DAG cannot be determined precisely. Tabulated values are rough estimates.

<sup>2</sup> Exact depth of base of TD cannot be determined precisely. Tabulated values are minima based on our drill core investigations.

### References:

- Büchi U.P., Lemcke K., Wiener G., Zimdars J. (1965) Geologische Ergebnisse der Erdölexploration auf das Mesozoikum im Untergrund des schweizerischen Molassebeckens. Bulletin der Vereinigung Schweizerischer Petroleum-Geologen und -Ingenieure 32, 7–38.
- Nagra (1985) Sondierbohrung Böttstein Untersuchungsbericht - Nagra Technischer Bericht NTB 85-01. Nagra, Wettingen, Switzerland.
- Nagra (1989) Sondierbohrung Weiach Untersuchungsbericht - Nagra Technischer Bericht NTB 88-08. Nagra, Wettingen, Switzerland.
- Nagra (1990) Sondierbohrung Riniken Untersuchungsbericht - Nagra Technischer Bericht NTB 88-09. Nagra, Wettingen, Switzerland.
- Nagra (1992a) Sondierbohrung Schafisheim Untersuchungsbericht - Nagra Technischer Bericht NTB 88-11. Nagra, Wettingen, Switzerland.
- Nagra, 1992b. Sondierbohrung Siblingen Untersuchungsbericht - Nagra Technischer Bericht NTB 90-34. Nagra, Wettingen, Switzerland.

## A2

Table A.2: Strontium isotope data for minerals and groundwater from various wells across the Swiss Molasse Basin.

| Locality     | Sample depth (m) | Phase              | Occurrence       | Unit            | $^{87}\text{Sr}/^{86}\text{Sr}$ | Sr ( $\mu\text{g/g}$ ) |
|--------------|------------------|--------------------|------------------|-----------------|---------------------------------|------------------------|
| Benken       | 828.14           | Dolomite           | Rock matrix      | TD              | 0.70844 <sup>1</sup>            | 89 <sup>1</sup>        |
| Benken       | 836.46           | Dolomite           | Rock matrix      | TD              | 0.70863 <sup>1</sup>            | 32 <sup>1</sup>        |
| Schlattingen | 1116.66          | Dolomite           | Rock matrix      | TD              | 0.70886                         | 45                     |
| Schlattingen | 1121.87          | Dolomite           | Rock matrix      | TD              | 0.70869                         | 44                     |
| Schlattingen | 1126.48          | Dolomite           | Rock matrix      | TD              | 0.70979                         | 35                     |
| Schlattingen | 1127.83          | Dolomite           | Rock matrix      | TD              | 0.71016                         | 36                     |
| Schafisheim  | 1252.38          | Dolomite           | Rock matrix      | TD              | 0.70967                         | –                      |
| Schafisheim  | 1233.93          | Dolomite           | Rock matrix      | TD              | 0.70812 <sup>2</sup>            | 85 <sup>2</sup>        |
| Böttstein    | 137.2            | Dolomite           | Rock matrix      | TD              | 0.71053 <sup>2</sup>            | 586 <sup>2</sup>       |
| Bözberg      | 64.82            | Dolomite           | Rock matrix      | TD              | 0.70804                         | –                      |
| Bözberg      | 94.66            | Dolomite           | Rock matrix      | TD              | 0.70876                         | –                      |
| Benken       | 853.98           | Dolomite + Calcite | Rock matrix      | HMK             | 0.70868 <sup>1</sup>            | 89 <sup>1</sup>        |
| Schlattingen | 1167.88          | Dolomite + Calcite | Rock matrix      | HMK             | 0.70824                         | 198                    |
| Schlattingen | 1168.31          | Dolomite + Calcite | Rock matrix      | HMK             | 0.70832                         | 185                    |
| Bözberg      | 98.52            | Dolomite + Calcite | Rock matrix      | HMK             | 0.70919                         | –                      |
| Schafisheim  | 1334.99          | Dolomite + Calcite | Rock matrix      | HMK             | 0.70813                         | –                      |
| Weiach       | 828.57-1         | Anhydrite          | Nodules and beds | TD              | 0.70880                         | 1026                   |
| Weiach       | 828.57-2         | Anhydrite          | Nodules and beds | TD              | 0.70872                         | 977                    |
| Weiach       | 831.33-1         | Anhydrite          | Nodules and beds | TD              | 0.70876                         | 1090                   |
| Weiach       | 831.33-2         | Anhydrite          | Nodules and beds | TD              | 0.70885                         | 1144                   |
| Weiach       | 834.25           | Anhydrite          | Nodules and beds | TD              | 0.70860                         | 1134                   |
| Weiach       | 824.85           | Anhydrite          | Nodules and beds | TD              | 0.70953 <sup>2</sup>            | 2437 <sup>2</sup>      |
| Weiach       | 828.72           | Anhydrite          | Nodules and beds | TD              | 0.70874 <sup>2</sup>            | 1222 <sup>2</sup>      |
| Schlattingen | 1121.87          | Anhydrite          | Nodules and beds | TD              | 0.70846                         | 1368                   |
| Schlattingen | 1133.43          | Anhydrite          | Nodules and beds | TD              | 0.70900                         | 1458                   |
| Schafisheim  | 1234.67          | Anhydrite          | Nodules and beds | TD              | 0.70822                         | –                      |
| Schafisheim  | 1294.17          | Anhydrite          | Nodules and beds | DAG             | 0.70805                         | –                      |
| Schafisheim  | 1295.76          | Anhydrite          | Nodules and beds | DAG             | 0.70804                         | –                      |
| Weiach       | 749.60           | Anhydrite          | Nodules and beds | Keuper          | 0.70821 <sup>2</sup>            | 1893 <sup>2</sup>      |
| Böttstein    | 53.37            | Anhydrite          | Nodules and beds | Keuper          | 0.70811 <sup>2</sup>            | 1576 <sup>2</sup>      |
| Böttstein    | 53.37            | Anhydrite          | Nodules and beds | Keuper          | 0.70814 <sup>2</sup>            | 2150 <sup>2</sup>      |
| Böttstein    | 59.00            | Anhydrite          | Nodules and beds | Keuper          | 0.70810 <sup>2</sup>            | 886 <sup>2</sup>       |
| Böttstein    | 88.90            | Anhydrite          | Nodules and beds | Keuper          | 0.70807 <sup>2</sup>            | 2701 <sup>2</sup>      |
| Benken       | 730.76           | Anhydrite          | Nodules and beds | Keuper          | 0.70840 <sup>1</sup>            | 1896 <sup>1</sup>      |
| Weiach       | 898.03           | Anhydrite          | Nodules and beds | Sulfatschichten | 0.70798                         | 1585                   |
| Weiach       | 904.43           | Anhydrite          | Nodules and beds | Sulfatschichten | 0.70803                         | 2746                   |
| Weiach       | 912.10           | Anhydrite          | Nodules and beds | Sulfatschichten | 0.70796                         | 1052                   |
| Weiach       | 923.27           | Anhydrite          | Nodules and beds | Sulfatschichten | 0.70829                         | 1570                   |
| Weiach       | 928.58           | Anhydrite          | Nodules and beds | Sulfatschichten | 0.70806                         | 1335                   |
| Weiach       | 937.74           | Anhydrite          | Nodules and beds | Sulfatschichten | 0.70846                         | 1420                   |
| Weiach       | 941.38           | Anhydrite          | Nodules and beds | Sulfatschichten | 0.70845                         | 2139                   |
| Weiach       | 943.12           | Anhydrite          | Nodules and beds | Sulfatschichten | 0.70854                         | 2056                   |

Continuation of Table A.2

| Locality     | Sample depth (m) | Phase     | Occurrence       | Unit            | $^{87}\text{Sr}/^{86}\text{Sr}$ | Sr ( $\mu\text{g/g}$ ) |
|--------------|------------------|-----------|------------------|-----------------|---------------------------------|------------------------|
| Weiach       | 910.15           | Anhydrite | Nodules and beds | Sulfatschichten | 0.70783 <sup>2</sup>            | 1105 <sup>2</sup>      |
| Schafisheim  | 1374.25          | Anhydrite | Nodules and beds | Sulfatschichten | 0.70785 <sup>2</sup>            | 1142 <sup>2</sup>      |
| Leuggern     | 116.43           | Anhydrite | Nodules and beds | Sulfatschichten | 0.70784 <sup>2</sup>            | 1196 <sup>2</sup>      |
| Böttstein    | 122.65           | Calcite   | Pore-filling     | TD              | 0.70936 <sup>2</sup>            | 100 <sup>2</sup>       |
| Böttstein    | 150.99           | Calcite   | Fracture-filling | TD              | 0.70877                         | –                      |
| Leuggern     | 54.08            | Calcite   | Pore-filling     | TD              | 0.70905 <sup>2</sup>            | 58 <sup>2</sup>        |
| Benken       | 846.46-1         | Calcite   | Shear surface    | TD              | 0.70865 <sup>1</sup>            | 61 <sup>1</sup>        |
| Benken       | 846.46-2         | Calcite   | Pore-filling     | TD              | 0.70839 <sup>1</sup>            | 34 <sup>1</sup>        |
| Schafisheim  | 1252.77-1        | Calcite   | Pore-filling     | TD              | 0.70882                         | –                      |
| Schafisheim  | 1252.77-2        | Calcite   | Pore-filling     | TD              | 0.70858                         | –                      |
| Weiach       | 844.99           | Calcite   | Pore-filling     | TD              | 0.71016                         | –                      |
| Weiach       | 861.58           | Calcite   | Pore-filling     | HMK             | 0.70929                         | –                      |
| Benken       | 853.98           | Calcite   | Fracture-filling | HMK             | 0.71079 <sup>1</sup>            | 105 <sup>1</sup>       |
| Benken       | 866.41           | Calcite   | Pore-filling     | HMK             | 0.71123                         | 133                    |
| Benken       | 866.42           | Calcite   | Pore-filling     | HMK             | 0.71137                         | 110                    |
| Benken       | 866.44           | Calcite   | Pore-filling     | HMK             | 0.71090                         | 67                     |
| Benken       | 866.46           | Calcite   | Pore-filling     | HMK             | 0.71173                         | 139                    |
| Schlattingen | 1157.34          | Calcite   | Pore-filling     | HMK             | 0.71629                         | 204                    |
| Schlattingen | 1164.33          | Calcite   | Pore-filling     | HMK             | 0.70964                         | 1924                   |
| Schlattingen | 1167.88          | Calcite   | Fracture-filling | HMK             | 0.71289                         | 197                    |
| Schlattingen | 1168.31          | Calcite   | Pore-filling     | HMK             | 0.71260                         | 169                    |
| Schafisheim  | 1329.20          | Calcite   | Fracture-filling | HMK             | 0.70966 <sup>2</sup>            | 233 <sup>2</sup>       |
| Schafisheim  | 1285.34          | Calcite   | Tension gash     | HMK             | 0.70965                         | –                      |
| Schafisheim  | 1330.70          | Calcite   | Fracture-filling | HMK             | 0.70959                         | –                      |
| Schafisheim  | 1334.99          | Calcite   | Fracture-filling | HMK             | 0.70968                         | –                      |
| Bözberg      | 98.52            | Calcite   | Fracture-filling | HMK             | 0.70838                         | –                      |
| Bözberg      | 135.69           | Calcite   | Fracture-filling | HMK             | 0.71231                         | –                      |
| Siblingen    | 209.95           | Calcite   | Pore-filling     | HMK             | 0.70945                         | –                      |
| Benken       | 878.25           | Calcite   | Fracture-filling | DAG             | 0.71023 <sup>1</sup>            | 1098 <sup>1</sup>      |
| Bözberg      | 147.61           | Calcite   | Fracture-filling | DAG             | 0.70855                         | –                      |
| Böttstein    | 196.94           | Calcite   | Pore-filling     | DAG             | 0.71213                         | –                      |
| Siblingen    | 241.60           | Calcite   | Fracture-filling | DAG             | 0.70938                         | –                      |
| Benken       | 401.68           | Calcite   | Fracture-filling | Jurassic        | 0.70712 <sup>1</sup>            | 231 <sup>1</sup>       |
| Benken       | 519.96           | Calcite   | Fracture-filling | Jurassic        | 0.70763 <sup>1</sup>            | –                      |
| Benken       | 635.67           | Calcite   | Fracture-filling | Jurassic        | 0.70847 <sup>1</sup>            | 283 <sup>1</sup>       |
| Benken       | 657.62           | Calcite   | Pore-filling     | Jurassic        | 0.70758 <sup>1</sup>            | 342 <sup>1</sup>       |
| Benken       | 712.76           | Calcite   | Fracture-filling | Keuper          | 0.70925 <sup>1</sup>            | 189 <sup>1</sup>       |
| Benken       | 713.26           | Calcite   | Fracture-filling | Keuper          | 0.70921 <sup>1</sup>            | 296 <sup>1</sup>       |
| Schafisheim  | 1485.75          | Calcite   | Fracture-filling | Buntsandstein   | 0.71300 <sup>2</sup>            | 3566 <sup>2</sup>      |
| Riniken      | 805.00           | Calcite   | Pore-filling     | Buntsandstein   | 0.71504 <sup>2</sup>            | 290 <sup>2</sup>       |
| Leuggern     | 218.61           | Calcite   | Pore-filling     | Buntsandstein   | 0.71659 <sup>2</sup>            | 107 <sup>2</sup>       |
| Riniken      | 1045.45          | Calcite   | Fracture-filling | Permian         | 0.71618 <sup>2</sup>            | 286 <sup>2</sup>       |
| Kaisten      | 1046.36          | Calcite   | Fracture-filling | CB              | 0.71701 <sup>2</sup>            | 148 <sup>2</sup>       |
| Leuggern     | 1511.32          | Calcite   | Fracture-filling | CB              | 0.71156 <sup>2</sup>            | –                      |

Continuation of Table A.2

| Locality     | Sample depth (m) | Phase           | Occurrence       | Unit   | $^{87}\text{Sr}/^{86}\text{Sr}$ | Sr ( $\mu\text{g/g}$ ) |
|--------------|------------------|-----------------|------------------|--------|---------------------------------|------------------------|
| Leuggern     | 1525.97          | Calcite         | Fracture-filling | CB     | 0.71105 <sup>2</sup>            | –                      |
| Leuggern     | 318.65           | Calcite         | Fracture-filling | CB     | 0.71129                         | –                      |
| Siblingen    | 1023.62          | Calcite         | Fracture-filling | CB     | 0.71535                         | –                      |
| Benken       | 998.99           | Calcite         | Fracture-filling | CB     | 0.71111                         | –                      |
| Schlattingen | 1116.66-1        | Anhydrite       | Fracture-filling | TD     | 0.71035                         | 1876                   |
| Schlattingen | 1116.66-2        | Anhydrite       | Fracture-filling | TD     | 0.70987                         | 1616                   |
| Schlattingen | 1135.58          | Anhydrite       | Pore-filling     | TD     | 0.71048                         | 2082                   |
| Schlattingen | 1136.98          | Anhydrite       | Pore-filling     | TD     | 0.70880                         | 1562                   |
| Schlattingen | 1127.83          | Anhydrite       | Fracture-filling | TD     | 0.70897                         | 966                    |
| Schlattingen | 1135.29          | Anhydrite       | Pore-filling     | TD     | 0.70928                         | 182                    |
| Schlattingen | 1140.15          | Anhydrite       | Pore-filling     | TD     | 0.71004                         | 742                    |
| Schafisheim  | 1228.45          | Anhydrite       | Fracture-filling | TD     | 0.70983                         | –                      |
| Schafisheim  | 1330.70          | Anhydrite       | Fracture-filling | HMK    | 0.70951                         | –                      |
| Schafisheim  | 1334.99          | Anhydrite       | Fracture-filling | HMK    | 0.70995                         | –                      |
| Berlingen    | 2189.45          | Saddle dolomite | Pore-filling     | TD     | 0.71273                         | –                      |
| Berlingen    | 2189.01          | Saddle dolomite | Pore-filling     | TD     | 0.71239                         | –                      |
| Berlingen    | 2180.64          | Saddle dolomite | Pore-filling     | TD     | 0.71330                         | –                      |
| Berlingen    | 2181.37          | Saddle dolomite | Pore-filling     | TD     | 0.71324                         | –                      |
| Berlingen    | 2189.11          | Saddle dolomite | Pore-filling     | TD     | 0.71227                         | –                      |
| Berlingen    | 2179.87          | Saddle dolomite | Pore-filling     | TD     | 0.71313                         | –                      |
| Lindau       | 2245.35          | Saddle dolomite | Pore-filling     | TD     | 0.71217                         | –                      |
| Lindau       | 2232.64          | Saddle dolomite | Pore-filling     | TD     | 0.71219                         | –                      |
| Kreuzlingen  | 2422.75          | Saddle dolomite | Pore-filling     | TD     | 0.71313                         | –                      |
| Kreuzlingen  | 2431.39          | Saddle dolomite | Pore-filling     | TD     | 0.71306                         | –                      |
| Kreuzlingen  | 2427.18          | Saddle dolomite | Pore-filling     | TD     | 0.71338                         | –                      |
| Kreuzlingen  | 2422.95          | Saddle dolomite | Pore-filling     | TD     | 0.71339                         | –                      |
| Herdern      | 1990.01          | Saddle dolomite | Pore-filling     | TD     | 0.71280                         | –                      |
| Herdern      | 1995.57          | Saddle dolomite | Pore-filling     | TD     | 0.71265                         | –                      |
| Herdern      | 1998.93          | Saddle dolomite | Pore-filling     | TD     | 0.71233                         | –                      |
| Böttstein    | 1490.70          | Rock matrix     | Whole rock       | CB     | 0.72716 <sup>2</sup>            | 207 <sup>2</sup>       |
| Weiach       | 2220.12          | Rock matrix     | Whole rock       | CB     | 0.71441 <sup>2</sup>            | 244 <sup>2</sup>       |
| Kaisten      | 1038.83          | Rock matrix     | Whole rock       | CB     | 0.72392 <sup>2</sup>            | –                      |
| Kaisten      | 1046.36          | Rock matrix     | Whole rock       | CB     | 0.72305 <sup>2</sup>            | –                      |
| Leuggern     | 1525.97          | Rock matrix     | Whole rock       | CB     | 0.72859 <sup>2</sup>            | 206 <sup>2</sup>       |
| Leuggern     | 1636.90          | Rock matrix     | Whole rock       | CB     | 0.76098 <sup>2</sup>            | 290 <sup>2</sup>       |
| Schafisheim  | 1879.79          | Rock matrix     | Whole rock       | CB     | 0.71405 <sup>2</sup>            | 494 <sup>2</sup>       |
| Benken       | 396.62           | Rock matrix     | Whole rock       | Malm   | 0.70704 <sup>1</sup>            | 385 <sup>1</sup>       |
| Benken       | 401.68           | Rock matrix     | Whole rock       | Malm   | 0.70708 <sup>1</sup>            | 390 <sup>1</sup>       |
| Benken       | 519.96           | Rock matrix     | Whole rock       | Dogger | 0.70743 <sup>1</sup>            | 216 <sup>1</sup>       |
| Benken       | 545.16           | Rock matrix     | Whole rock       | Dogger | 0.70784 <sup>1</sup>            | 179 <sup>1</sup>       |
| Benken       | 571.55           | Rock matrix     | Whole rock       | Dogger | 0.70773 <sup>1</sup>            | 256 <sup>1</sup>       |
| Benken       | 582.09           | Rock matrix     | Whole rock       | Dogger | 0.70789 <sup>1</sup>            | 163 <sup>1</sup>       |
| Benken       | 635.67           | Rock matrix     | Whole rock       | Dogger | 0.70818 <sup>1</sup>            | 134 <sup>1</sup>       |
| Benken       | 645.05           | Rock matrix     | Whole rock       | Dogger | 0.70808 <sup>1</sup>            | 203 <sup>1</sup>       |

Continuation of Table A.2

| Locality    | Sample depth (m) | Phase       | Occurrence  | Unit          | $^{87}\text{Sr}/^{86}\text{Sr}$ | Sr ( $\mu\text{g/g}$ ) |
|-------------|------------------|-------------|-------------|---------------|---------------------------------|------------------------|
| Benken      | 657.62           | Rock matrix | Whole rock  | Liassic       | 0.70747 <sup>1</sup>            | 678 <sup>1</sup>       |
| Benken      | 683.27           | Rock matrix | Whole rock  | Liassic       | 0.70911 <sup>1</sup>            | 112 <sup>1</sup>       |
| Benken      | 702.37           | Rock matrix | Whole rock  | Keuper        | 0.70902 <sup>1</sup>            | 1033 <sup>1</sup>      |
| Benken      | 712.76           | Rock matrix | Whole rock  | Keuper        | 0.70864 <sup>1</sup>            | 513 <sup>1</sup>       |
| Benken      | 713.26           | Rock matrix | Whole rock  | Keuper        | 0.70879 <sup>1</sup>            | 1099 <sup>1</sup>      |
| Benken      | 730.76           | Rock matrix | Whole rock  | Keuper        | 0.70889 <sup>1</sup>            | 88 <sup>1</sup>        |
| Böttstein   | 123–202          | Water       | Groundwater | UMK           | 0.70968 <sup>2</sup>            | 11 <sup>2</sup>        |
| Benken      | 813–826          | Water       | Groundwater | UMK           | 0.70830 <sup>1</sup>            | 6.5 <sup>1</sup>       |
| Weiach      | 822–896          | Water       | Groundwater | UMK           | 0.70881 <sup>2</sup>            | 7.9 <sup>2</sup>       |
| Schafisheim | 1227–1293        | Water       | Groundwater | UMK           | 0.70919 <sup>2</sup>            | 17.2 <sup>2</sup>      |
| Riniken     | 617–696          | Water       | Groundwater | UMK           | 0.70924 <sup>2</sup>            | 13.6 <sup>2</sup>      |
| Leuggern    | 53–96            | Water       | Groundwater | UMK           | 0.70867 <sup>2</sup>            | 3.1 <sup>2</sup>       |
| Weiach      | 981–989          | Water       | Groundwater | Buntsandstein | 0.71652 <sup>2</sup>            | 11.3 <sup>3</sup>      |
| Böttstein   | 305–319          | Water       | Groundwater | Buntsandstein | 0.71455 <sup>2</sup>            | 0.9 <sup>2</sup>       |
| Schafisheim | 1476–1500        | Water       | Groundwater | Buntsandstein | 0.71343 <sup>2</sup>            | 17.8 <sup>3</sup>      |
| Schafisheim | 1564–1577        | Water       | Groundwater | Buntsandstein | 0.71442 <sup>2</sup>            | 0.5 <sup>2</sup>       |
| Riniken     | 793–820          | Water       | Groundwater | Buntsandstein | 0.71506 <sup>2</sup>            | 16.0 <sup>3</sup>      |
| Kaisten     | 617–696          | Water       | Groundwater | Buntsandstein | 0.71386 <sup>2</sup>            | 12.6 <sup>2</sup>      |
| Leuggern    | 208–227          | Water       | Groundwater | Buntsandstein | 0.71629 <sup>2</sup>            | 0.7 <sup>2</sup>       |
| Benken      | 974–983          | Water       | Groundwater | Buntsandstein | 0.71485 <sup>1</sup>            | 0.3 <sup>1</sup>       |
| Böttstein   | 393–405          | Water       | Groundwater | CB            | 0.71730 <sup>2</sup>            | 0.4 <sup>2</sup>       |
| Böttstein   | 618–624          | Water       | Groundwater | CB            | 0.71752 <sup>2</sup>            | 0.1 <sup>3</sup>       |
| Weiach      | 2211–2224        | Water       | Groundwater | CB            | 0.71671 <sup>2</sup>            | 4.7 <sup>2</sup>       |
| Schafisheim | 1883–1892        | Water       | Groundwater | CB            | –                               | 16.2 <sup>3</sup>      |
| Leuggern    | 507–568          | Water       | Groundwater | CB            | 0.71672 <sup>2</sup>            | 0.5 <sup>2</sup>       |
| Leuggern    | 702–709          | Water       | Groundwater | CB            | 0.71656 <sup>2</sup>            | 0.5 <sup>2</sup>       |
| Leuggern    | 1179–1227        | Water       | Groundwater | CB            | 0.71729 <sup>2</sup>            | 0.3 <sup>2</sup>       |
| Leuggern    | 1427–1439        | Water       | Groundwater | CB            | 0.71741 <sup>2</sup>            | 0.7 <sup>2</sup>       |
| Leuggern    | 1642–1688        | Water       | Groundwater | CB            | 0.71747 <sup>2</sup>            | 0.4 <sup>2</sup>       |
| Kaisten     | 475–489          | Water       | Groundwater | CB            | 0.71722 <sup>2</sup>            | 1.5 <sup>3</sup>       |
| Kaisten     | 816–822          | Water       | Groundwater | CB            | 0.71767 <sup>2</sup>            | 1.3 <sup>2</sup>       |
| Kaisten     | 1021–1040        | Water       | Groundwater | CB            | 0.71778 <sup>2</sup>            | 1.4 <sup>2</sup>       |
| Kaisten     | 1238–1305        | Water       | Groundwater | CB            | 0.71711 <sup>2</sup>            | 1.0 <sup>2</sup>       |
| Bruche      | –                | Water       | River water | CB dominated  | 0.71051 <sup>4</sup>            | 0.04 <sup>4</sup>      |
| Geissen     | –                | Water       | River water | CB dominated  | 0.71639 <sup>4</sup>            | 0.03 <sup>4</sup>      |
| Weiss       | –                | Water       | River water | CB dominated  | 0.71692 <sup>4</sup>            | 0.03 <sup>4</sup>      |
| Fecht       | –                | Water       | River water | CB dominated  | 0.71330 <sup>4</sup>            | 0.03 <sup>4</sup>      |
| Lauch       | –                | Water       | River water | CB dominated  | 0.70906 <sup>4</sup>            | 0.04 <sup>4</sup>      |
| Thur        | –                | Water       | River water | CB dominated  | 0.71015 <sup>4</sup>            | 0.03 <sup>4</sup>      |
| Doller      | –                | Water       | River water | CB dominated  | 0.70913 <sup>4</sup>            | 0.03 <sup>4</sup>      |
| Murg        | –                | Water       | River water | CB dominated  | 0.71414 <sup>4</sup>            | 0.02 <sup>4</sup>      |
| Kinzig      | –                | Water       | River water | CB dominated  | 0.71413 <sup>4</sup>            | 0.04 <sup>4</sup>      |
| Elz-1       | –                | Water       | River water | CB dominated  | 0.71096 <sup>4</sup>            | 0.10 <sup>4</sup>      |
| Elz-2       | –                | Water       | River water | CB dominated  | 0.71306 <sup>4</sup>            | 0.03 <sup>4</sup>      |

Continuation of Table A.2

| Locality     | Sample depth (m) | Phase | Occurrence | Unit    | $^{87}\text{Sr}/^{86}\text{Sr}$ | Sr ( $\mu\text{g/g}$ ) |
|--------------|------------------|-------|------------|---------|---------------------------------|------------------------|
| Vosges       | —                | Water | Shallow GW | CB      | 0.71267 <sup>4</sup>            | 0.91 <sup>4</sup>      |
| Vosges       | —                | Water | Shallow GW | CB      | 0.71571 <sup>4</sup>            | 0.06 <sup>4</sup>      |
| Black Forest | —                | Water | Shallow GW | CB      | 0.71393 <sup>4</sup>            | 0.09 <sup>4</sup>      |
| Black Forest | —                | Water | Shallow GW | CB      | 0.71381 <sup>4</sup>            | 0.07 <sup>4</sup>      |
| Nettenbach   | —                | Water | Shallow GW | OSM     | 0.70963 <sup>5</sup>            | —                      |
| Stahringen   | —                | Water | Shallow GW | OSM     | 0.70961 <sup>5</sup>            | —                      |
| Hemmenhofen  | —                | Water | Shallow GW | OSM     | 0.70949 <sup>5</sup>            | —                      |
| Bankholzen   | —                | Water | Shallow GW | OSM     | 0.70938 <sup>5</sup>            | —                      |
| Horn         | 58–82            | Water | Shallow GW | OSM     | 0.70929 <sup>5</sup>            | —                      |
| Gundholzen   | —                | Water | Shallow GW | OSM     | 0.70905 <sup>5</sup>            | —                      |
| —            | —                | Water | Shallow GW | OSM–UMM | 0.7079–0.7091 <sup>6</sup>      | —                      |

TD: Trigonodus Dolomit

HMK: Hauptmuschelkalk

DAG: Dolomit der Anhydritgruppe

CB: Crystalline basement

OSM: Upper Freshwater Molasse

UMM: Lower Seawater Molasse

<sup>1</sup> Nagra [38]<sup>2</sup> Pearson et al. [20]<sup>3</sup> Wittwer [61]<sup>4</sup> Durand et al. [40]<sup>5</sup> Waber et al. [21]<sup>6</sup> McArthur et al. [39]

### A3

Table A.3: Compilation of microthermometric analyses of primary fluid inclusions in secondary minerals from various wells across the Swiss Molasse Basin.

| Well         | Sample ID   | Mineral         | Occurrence       | Unit | Trapping mode                                    | Analysed assemblages | $T_{trap}$ (° C) | $T_{m,ice}$ (° C) | Salinity (wt.% NaCl <sub>eq</sub> ) |
|--------------|-------------|-----------------|------------------|------|--------------------------------------------------|----------------------|------------------|-------------------|-------------------------------------|
| Benken       | BEN 825.11  | Quartz          | Pore-filling     | TD   | Heterogeneous (aq. liquid + CH <sub>4</sub> gas) | 1                    | 52               | -22.3 to -0.7     | 1.2–23.9*                           |
| Benken       | BEN 828.14  | Quartz          | Pore-filling     | TD   | Heterogeneous (aq.liquid + CH <sub>4</sub> gas)  | 3                    | 41–47            | -21.0 to -6.2     | 9.5–23.0*                           |
| Schlattingen | SLA 1126.46 | Quartz          | Pore-filling     | TD   | Heterogeneous (aq.liquid + CH <sub>4</sub> gas)  | 6                    | 42–58            | -20.9 to -2.1     | 3.5–23.0*                           |
| Schlattingen | SLA 1127.44 | Quartz          | Pore-filling     | TD   | Heterogeneous (aq.liquid + CH <sub>4</sub> gas)  | 4                    | 42–48            | -21.9 to -3.7     | 6.0–23.6*                           |
| Benken       | BEN 866.44  | Calcite         | Pore-filling     | HMK  | Heterogeneous (aq.liquid + CH <sub>4</sub> gas)  | 5                    | 85–88            | -1.9 to -0.2      | 0.4–3.2                             |
| Benken       | BEN 998.99  | Calcite         | Fracture-filling | CB   | Heterogeneous (aq.liquid + CH <sub>4</sub> gas)  | 2                    | 55–62            | -28.6 to -20.2    | 22.5–27.8*                          |
| Schlattingen | SLA 1127.83 | Calcite         | Fracture-filling | TD   | Heterogeneous (aq.liquid + CH <sub>4</sub> gas)  | 1                    | 80               | -1.0 to -0.1      | 0.2–2.7                             |
| Schlattingen | SLA 1135.29 | Calcite         | Pore-filling     | TD   | Heterogeneous (aq.liquid + CH <sub>4</sub> gas)  | 1                    | 89               | -2.9 to -1.5      | 2.6–4.8                             |
| Schlattingen | SLA 1157.34 | Calcite         | Pore-filling     | HMK  | Heterogeneous (aq.liquid + CH <sub>4</sub> gas)  | 1                    | 76               | -3.4              | 5.6                                 |
| Schlattingen | SLA 1167.88 | Calcite         | Fracture-filling | HMK  | Heterogeneous (aq.liquid + CH <sub>4</sub> gas)  | 1                    | 78               | -4.0 to -3.1      | 5.1–6.5                             |
| Siblingen    | SIB 241.60  | Calcite         | Fracture-filling | HMK  | Heterogeneous (aq.liquid + CH <sub>4</sub> gas)  | 3                    | 65–75            | -0.1 to -1.7      | 0.2–2.9                             |
| Siblingen    | SIB 1023.62 | Calcite         | Fracture-filling | CB   | Heterogeneous (aq.liquid + CH <sub>4</sub> gas)  | 3                    | 65–75            | -0.1 to -0.3      | 0.2–0.5                             |
| Leuggern     | LEU 318.65  | Calcite         | Fracture-filling | CB   | Heterogeneous (aq.liquid + CH <sub>4</sub> gas)  | 2                    | 85–95            | -28.7 to -21.1    | 23.1–27.8*                          |
| Böttstein    | BOE 150.99  | Calcite         | Fracture-filling | TD   | Heterogeneous (aq.liquid + CH <sub>4</sub> gas)  | 3                    | 51–55            | -12.7 to -17.7    | 16.6–20.7                           |
| Bözberg      | BOZ 98.52   | Calcite         | Fracture-filling | HMK  | Heterogeneous (aq.liquid + CH <sub>4</sub> gas)  | 2                    | 68–79            | -23.7 to -15.2    | 18.8–24.9*                          |
| Schafisheim  | SHA 1285.34 | Calcite         | Tension gash     | HMK  | Heterogeneous (aq.liquid + CH <sub>4</sub> gas)  | 4                    | 75–85            | -12.3 to -4.0     | 6.5–16.3                            |
| Schafisheim  | SHA 1252.77 | Calcite         | Pore-filling     | TD   | Heterogeneous (aq.liquid + CH <sub>4</sub> gas)  | 3                    | 52–65            | -22.5 to -5.1     | 8.0–24.1*                           |
| Schafisheim  | SHA 1334.99 | Calcite         | Fracture-filling | DAG  | Heterogeneous (aq.liquid + CH <sub>4</sub> gas)  | 1                    | 65               | -21.4 to -6.4     | 9.7–23.4*                           |
| Schafisheim  | SHA 1252.38 | Calcite         | Pore-filling     | TD   | Heterogeneous (aq.liquid + CH <sub>4</sub> gas)  | 1                    | 65               | -22.5 to -5.0     | 7.9–24.1*                           |
| Lindau       | LIN 2245.35 | Saddle dolomite | Pore-filling     | TD   | Homogeneous (aq. liquid)                         | 6                    | 155–161**        | -4.8 to -3.1      | 5.1–7.6                             |
| Berlingen    | BER 2189.11 | Saddle dolomite | Pore-filling     | TD   | Homogeneous (aq. liquid)                         | 5                    | 152–156**        | -4.2 to -2.1      | 3.6–6.7                             |

HMK: Hauptmuschelkalk

DAG: Dolomit der Anhydritgruppe

CB: Crystalline basement

$T_{trap}$ : Fluid inclusion trapping temperature

$T_{m,ice}$ : Final ice melting temperature

Salinities are calculated according to Hall et al. [44]

\*: The measured final ice melting temperatures below the eutectic temperature of NaCl-H<sub>2</sub>O fluids (-21.2 °C; [44]) indicate that the corresponding parent-water contained other salts beside NaCl. The presence of Ca and Mg in the host rocks point towards additional CaCl<sub>2</sub> and MgCl<sub>2</sub>.

\*\* Pressure corrected fluid inclusion trapping temperatures.

# A4

Table A.4: Results of the oxygen isotope analyses and calculated parent-waters of secondary quartz, calcite and dolomite from various wells across the Swiss Molasse Basin.

| Well         | Sample depth (m) | Mineral         | Occurrence       | Unit | $\delta^{18}\text{O}_{\text{mineral}}$ (‰ VSMOW) | $T_{\text{trap}}$ (° C) | $\delta^{18}\text{O}_{\text{parent-water}}$ (‰ VSMOW) |
|--------------|------------------|-----------------|------------------|------|--------------------------------------------------|-------------------------|-------------------------------------------------------|
| Benken       | 825.11-1         | Quartz          | Pore-filling     | TD   | 27.3                                             | 41–52                   | -4.6 to -2.1                                          |
| Benken       | 825.11-2         | Quartz          | Pore-filling     | TD   | 27.3                                             | 41–52                   | -4.6 to -2.1                                          |
| Benken       | 825.11-3         | Quartz          | Pore-filling     | TD   | 25.9                                             | 41–52*                  | -6.0 to -3.5                                          |
| Benken       | 825.11-4         | Quartz          | Pore-filling     | TD   | 25.5                                             | 41–52                   | -6.4 to -3.9                                          |
| Benken       | 828.14-1         | Quartz          | Pore-filling     | TD   | 25.1                                             | 41–52                   | -6.8 to -4.3                                          |
| Benken       | 828.14-2         | Quartz          | Pore-filling     | TD   | 27.3                                             | 41–52*                  | -4.6 to -2.1                                          |
| Benken       | 828.14-3         | Quartz          | Pore-filling     | TD   | 26.4                                             | 41–52                   | -5.5 to -3.0                                          |
| Benken       | 828.14-4         | Quartz          | Pore-filling     | TD   | 26.0                                             | 41–52                   | -5.9 to -3.4                                          |
| Benken       | 839.81-1         | Calcite         | Pore-filling     | TD   | 15.2                                             | 85–88                   | -3.6 to -3.2                                          |
| Benken       | 839.81-2         | Calcite         | Pore-filling     | TD   | 15.0                                             | 85–88                   | -3.8 to -3.4                                          |
| Benken       | 833.87           | Calcite         | Pore-filling     | TD   | 15.5                                             | 85–88                   | -3.3 to -3.0                                          |
| Benken       | 866.41           | Calcite         | Pore-filling     | HMK  | 14.4                                             | 85–88                   | -4.4 to -4.0                                          |
| Benken       | 866.42           | Calcite         | Pore-filling     | HMK  | 15.0                                             | 85–88                   | -3.8 to -3.4                                          |
| Benken       | 866.44           | Calcite         | Pore-filling     | HMK  | 14.0                                             | 85–88*                  | -4.8 to -4.4                                          |
| Benken       | 866.45           | Calcite         | Pore-filling     | HMK  | 15.3                                             | 85–88                   | -3.5 to -3.1                                          |
| Benken       | 866.46           | Calcite         | Pore-filling     | HMK  | 14.0                                             | 85–88                   | -4.8 to -4.4                                          |
| Benken       | 866.47           | Calcite         | Pore-filling     | HMK  | 15.5                                             | 85–88                   | -3.3 to -2.9                                          |
| Benken       | 866.49           | Calcite         | Pore-filling     | HMK  | 13.9                                             | 85–88                   | -4.9 to -4.5                                          |
| Benken       | 998.99           | Calcite         | Fracture-filling | CB   | 22.0                                             | 55–62*                  | -0.9 to 0.1                                           |
| Bözberg      | 98.52            | Calcite         | Fracture-filling | HMK  | 24.3                                             | 68–79                   | 3.3 to 4.8                                            |
| Bözberg      | 105.20           | Calcite         | Fracture-filling | HMK  | 19.6                                             | 68–79*                  | -1.4 to 0.1                                           |
| Bözberg      | 135.69           | Calcite         | Fracture-filling | DAG  | 18.4                                             | 68–79                   | -2.6 to -1.1                                          |
| Schlattingen | 1157.34          | Calcite         | Pore-filling     | HMK  | 15.2                                             | 76*                     | -4.7                                                  |
| Schlattingen | 1167.88          | Calcite         | Fracture-filling | HMK  | 14.8                                             | 78*                     | -4.9                                                  |
| Schlattingen | 1168.31          | Calcite         | Pore-filling     | HMK  | 14.1                                             | 76–89                   | -5.9 to -4.3                                          |
| Schlattingen | 1170.48          | Calcite         | Fracture-filling | DAG  | 13.9                                             | 76–89                   | -6.0 to -4.4                                          |
| Schlattingen | 1171.00          | Calcite         | Fracture-filling | DAG  | 14.7                                             | 76–89                   | -5.2 to -3.6                                          |
| Schlattingen | 1177.10          | Calcite         | Pore-filling     | DAG  | 13.5                                             | 76–89                   | -6.4 to -4.8                                          |
| Schafisheim  | 1252.77          | Calcite         | Fracture-filling | TD   | 26.2                                             | 52–65*                  | 2.8 to 4.8                                            |
| Schafisheim  | 1285.34          | Calcite         | Tension gash     | HMK  | 24.6                                             | 75–85*                  | 4.6 to 5.9                                            |
| Schafisheim  | 1327.06          | Calcite         | Fracture-filling | DAG  | 25.8                                             | 65                      | 4.3                                                   |
| Schafisheim  | 1330.70          | Calcite         | Fracture-filling | DAG  | 22.6                                             | 65                      | 1.1                                                   |
| Schafisheim  | 1334.99          | Calcite         | Fracture-filling | DAG  | 24.1                                             | 65*                     | 2.7                                                   |
| Böttstein    | 146.31           | Calcite         | Pore-filling     | TD   | 17.8                                             | 51–55                   | -5.8 to -5.2                                          |
| Böttstein    | 150.99           | Calcite         | Fracture-filling | TD   | 20.9                                             | 51–55*                  | -2.7 to -2.1                                          |
| Böttstein    | 196.94           | Calcite         | Pore-filling     | HMK  | 16.3                                             | 51–55                   | -7.2 to -6.6                                          |
| Siblingen    | 244.72           | Calcite         | Pore-filling     | DAG  | 15.6                                             | 65–75                   | -5.8 to -4.5                                          |
| Siblingen    | 241.60           | Calcite         | Fracture-filling | DAG  | 17.4                                             | 65–75*                  | -4.1 to -2.7                                          |
| Siblingen    | 209.95           | Calcite         | Pore-filling     | HMK  | 18.9                                             | 65–75                   | -2.5 to -1.1                                          |
| Siblingen    | 242.37           | Calcite         | Fracture-filling | DAG  | 17.1                                             | 65–75                   | -4.3 to -2.9                                          |
| Lindau       | 2250.14          | Saddle dolomite | Pore-filling     | TD   | 23.6                                             | >141–147                | 8.5 to 9.0                                            |
| Lindau       | 2232.64          | Saddle dolomite | Pore-filling     | TD   | 21.2                                             | >141–147                | 6.1 to 6.6                                            |
| Lindau       | 2245.35          | Saddle dolomite | Pore-filling     | TD   | 21.9                                             | >141–147*               | 6.7 to 7.2                                            |
| Lindau       | 2249.42          | Saddle dolomite | Pore-filling     | TD   | 23.5                                             | >141–147                | 8.3 to 8.8                                            |

Continuation of Table A.4

| Well      | Sample depth (m) | Mineral         | Occurrence       | Unit | $\delta^{18}\text{O}_{\text{mineral}}$ (‰ VSMOW) | $T_{\text{trap}}$ (° C) | $\delta^{18}\text{O}_{\text{parent-water}}$ (‰ VSMOW) |
|-----------|------------------|-----------------|------------------|------|--------------------------------------------------|-------------------------|-------------------------------------------------------|
| Berlingen | 2179.87          | Saddle dolomite | Pore-filling     | TD   | 13.7                                             | >138–142                | -1.8 to -1.4                                          |
| Berlingen | 2180.64          | Saddle dolomite | Pore-filling     | TD   | 13.8                                             | >138–142                | -1.6 to -1.3                                          |
| Berlingen | 2189.45          | Saddle dolomite | Pore-filling     | TD   | 13.5                                             | >138–142                | -2.0 to -1.6                                          |
| Berlingen | 2181.37          | Saddle dolomite | Pore-filling     | TD   | 15.0                                             | >138–142                | -0.4 to -0.1                                          |
| Berlingen | 2189.11          | Saddle dolomite | Pore-filling     | TD   | 14.6                                             | >138–142*               | -0.9 to -0.5                                          |
| Siblingen | 1023.62          | Calcite         | Fracture-filling | CB   | 11.9                                             | 65–75*                  | -9.5 to -8.2                                          |
| Siblingen | 770.36           | Calcite         | Fracture-filling | CB   | 11.5 <sup>1</sup>                                | 65–75                   | -9.9 to -8.5                                          |
| Siblingen | 1162.67          | Calcite         | Fracture-filling | CB   | 12.5 <sup>1</sup>                                | 65–75                   | -9.0 to -7.6                                          |
| Siblingen | 1249.04          | Calcite         | Fracture-filling | CB   | 12.0 <sup>1</sup>                                | 65–75                   | -9.4 to -8.1                                          |
| Siblingen | 1371.68          | Calcite         | Fracture-filling | CB   | 10.7 <sup>1</sup>                                | 65–75                   | -10.7 to -9.3                                         |
| Leuggern  | 318.65           | Calcite         | Fracture-filling | CB   | 20.8                                             | 85–95*                  | 2.0 to 3.2                                            |
| Leuggern  | 863.35           | Calcite         | Fracture-filling | CB   | 12.4 <sup>2</sup>                                | 65–75                   | -9.1 to -7.7                                          |
| Leuggern  | 949.88           | Calcite         | Fracture-filling | CB   | 14.1 <sup>2</sup>                                | 65–75                   | -7.3 to -5.9                                          |
| Leuggern  | 1046.05          | Calcite         | Fracture-filling | CB   | 11.3 <sup>2</sup>                                | 65–75                   | -10.2 to -8.8                                         |
| Leuggern  | 1188.00          | Calcite         | Fracture-filling | CB   | 12.5 <sup>2</sup>                                | 65–75                   | -8.9 to -7.5                                          |
| Leuggern  | 1197.42          | Calcite         | Fracture-filling | CB   | 11.9 <sup>2</sup>                                | 65–75                   | -9.5 to -8.2                                          |
| Leuggern  | 1212.7           | Calcite         | Fracture-filling | CB   | 11.2 <sup>2</sup>                                | 65–75                   | -10.2 to -8.9                                         |
| Leuggern  | 1298.18          | Calcite         | Fracture-filling | CB   | 10.8 <sup>2</sup>                                | 65–75                   | -10.7 to -9.3                                         |
| Kaisten   | 799.88           | Calcite         | Fracture-filling | CB   | 14.2 <sup>3</sup>                                | 65–75                   | -7.3 to -5.9                                          |
| Kaisten   | 819.67           | Calcite         | Fracture-filling | CB   | 14.4 <sup>3</sup>                                | 65–75                   | -7.0 to -5.7                                          |
| Kaisten   | 834.28           | Calcite         | Fracture-filling | CB   | 13.7 <sup>3</sup>                                | 65–75                   | -7.8 to -6.4                                          |
| Kaisten   | 846.88           | Calcite         | Fracture-filling | CB   | 15.0 <sup>3</sup>                                | 65–75                   | -6.4 to -5.0                                          |
| Kaisten   | 918.72           | Calcite         | Fracture-filling | CB   | 13.0 <sup>3</sup>                                | 65–75                   | -8.5 to -7.1                                          |
| Kaisten   | 1048.8           | Calcite         | Fracture-filling | CB   | 14.6 <sup>3</sup>                                | 65–75                   | -6.8 to -5.5                                          |
| Kaisten   | 1205.11          | Calcite         | Fracture-filling | CB   | 11.7 <sup>3</sup>                                | 65–75                   | -9.7 to -8.3                                          |
| Kaisten   | 1273.94          | Calcite         | Fracture-filling | CB   | 14.5 <sup>3</sup>                                | 65–75                   | -6.9 to -5.6                                          |
| Kaisten   | 1273.94          | Calcite         | Fracture-filling | CB   | 10.8 <sup>3</sup>                                | 65–75                   | -10.6 to -9.3                                         |

TD: Trigonodus Dolomit

HMK: Hauptmuschelkalk

DAG: Dolomit der Anhydritgruppe

CB: Crystalline basement

 $T_{\text{trap}}$ : Fluid inclusion trapping temperature

\*: Samples with constraints on precipitation temperature from fluid inclusion studies.

Those temperatures provide the basis for calculating the parent-water of samples without temperature constraints from fluid inclusion studies.

<sup>1</sup> Nagra [51]<sup>2</sup> Peters et al. [47]<sup>3</sup> Nagra [50]

# A5

Table A.5: Results of the oxygen and hydrogen isotope analyses of secondary kaolinite and calculated parent-waters from various wells across the Swiss Molasse Basin.

| Well         | Sample depth (m) | Phase     | Occurrence       | Unit | $\delta^{18}\text{O}_{\text{mineral}}$<br>(‰ VSMOW) | $\delta^2\text{H}_{\text{mineral}}$<br>(‰ VSMOW) | $T_{\text{precip.}}$ (° C) | $\delta^{18}\text{O}_{\text{parent-water}}$<br>(‰ VSMOW) | $\delta^2\text{H}_{\text{parent-water}}$<br>(‰ VSMOW) |
|--------------|------------------|-----------|------------------|------|-----------------------------------------------------|--------------------------------------------------|----------------------------|----------------------------------------------------------|-------------------------------------------------------|
| Benken       | 811.36           | Kaolinite | Pore-filling     | TD   | 10.00                                               | -82.0                                            | 85–88                      | -4.77 to -4.41                                           | -57.4 to -57.2                                        |
| Benken       | 833.87           | Kaolinite | Pore-filling     | TD   | 9.80                                                | -80.5                                            | 85–88                      | -4.97 to -4.61                                           | -55.9 to -55.7                                        |
| Benken       | 839.81           | Kaolinite | Pore-filling     | TD   | 9.30                                                | -80.2                                            | 85–88                      | -5.47 to -5.11                                           | -55.6 to -55.4                                        |
| Benken       | 839.81           | Kaolinite | Pore-filling     | TD   | 10.19                                               | -78.5                                            | 85–88                      | -4.58 to -4.22                                           | -53.9 to -53.7                                        |
| Benken       | 811.36           | Kaolinite | Pore-filling     | TD   | 10.23                                               | -79.9                                            | 85–88                      | -4.54 to -4.18                                           | -55.3 to -55.1                                        |
| Benken       | 826.87           | Kaolinite | Pore-filling     | TD   | 10.61                                               | -87.5                                            | 85–88                      | -4.16 to -3.8                                            | -62.9 to -62.7                                        |
| Schlattingen | 1130.94          | Kaolinite | Pore-filling     | TD   | 9.36                                                | -82.0                                            | 76–89                      | -6.53 to -4.93                                           | -56.5 to -57.3                                        |
| Schlattingen | 1127.44          | Kaolinite | Pore-filling     | TD   | 9.17                                                | -85.5                                            | 76–89                      | -6.72 to -5.12                                           | -61.0 to -59.8                                        |
| Schlattingen | 1130.50          | Kaolinite | Pore-filling     | TD   | 8.28                                                | -88.5                                            | 76–89                      | -7.61 to -6.01                                           | -64.0 to -62.8                                        |
| Weiach       | 843.36           | Kaolinite | Pore-filling     | TD   | 10.90                                               | -86.5                                            | 76–89                      | -4.99 to -3.39                                           | -62.0 to -60.8                                        |
| Schlattingen | 1159.50          | Kaolinite | Pore-filling     | HMK  | 10.14                                               | -83.0                                            | 76–89                      | -5.75 to -4.15                                           | -58.5 to -57.3                                        |
| Schlattingen | 1164.33          | Kaolinite | Pore-filling     | HMK  | 9.46                                                | -91.0                                            | 76–89                      | -6.43 to -4.83                                           | -66.5 to -65.3                                        |
| Siblingen    | 401.82           | Kaolinite | Fracture-filling | CB   |                                                     | -91.9                                            | 70–80                      |                                                          | -66.5 to -65.5                                        |
| Siblingen    | 456.34           | Kaolinite | Fracture-filling | CB   |                                                     | -94.1                                            | 71–81                      |                                                          | -69.5 to -68.6                                        |
| Siblingen    | 659.67           | Kaolinite | Fracture-filling | CB   |                                                     | -95.6                                            | 78–88                      |                                                          | -71.1 to -70.1                                        |
| Siblingen    | 701.29           | Kaolinite | Fracture-filling | CB   |                                                     | -91.5                                            | 79–89                      |                                                          | -67.0 to -66.0                                        |
| Siblingen    | 828.11           | Kaolinite | Fracture-filling | CB   |                                                     | -91.4                                            | 83–93                      |                                                          | -67.3 to -66.3                                        |
| Siblingen    | 915.58           | Kaolinite | Fracture-filling | CB   |                                                     | -90.3                                            | 85–95                      |                                                          | -66.1 to -65.2                                        |
| Siblingen    | 922.95           | Kaolinite | Fracture-filling | CB   |                                                     | -89.3                                            | 85–95                      |                                                          | -65.4 to -64.4                                        |

TD: Trigonodus Dolomit

HMK: Hauptmuschelkalk

CB: Crystalline basement

$T_{\text{precip.}}$ : Precipitation temperature of kaolinite derived from  
fluid inclusion studies in coeval calcite

## A6

Table A.6: Results of the sulphur isotope analyses of anhydrite nodules and secondary pore- and fracture-filling anhydrite in the Muschelkalk and the overlying Keuper.

| Well         | Sample depth (m) | Mineral   | Occurrence                 | Unit            | $\delta^{34}\text{S}_{\text{anhydrite}}$ (‰ VCDT) |
|--------------|------------------|-----------|----------------------------|-----------------|---------------------------------------------------|
| Benken       | 931.75 M         | Anhydrite | Rock                       | Sulfatschichten | 18.8 <sup>1</sup>                                 |
| Weiach       | 910.15           | Anhydrite | Massive bed                | Sulfatschichten | 18.5 <sup>2</sup>                                 |
| Böttstein    | 241.16           | Anhydrite | Rock                       | Sulfatschichten | 19.5 <sup>2</sup>                                 |
| Schafisheim  | 1294.17          | Anhydrite | Massive bed                | DAG             | 18.6                                              |
| Schafisheim  | 1295.76          | Anhydrite | Massive bed                | DAG             | 18.5                                              |
| Weiach       | 824.85           | Anhydrite | Blocky anhydrite, nodule   | TD              | 19.2 <sup>2</sup>                                 |
| Weiach       | 828.72           | Anhydrite | Felted anhydrite, nodule   | TD              | 18.7 <sup>2</sup>                                 |
| Schlattingen | 1121.87          | Anhydrite | Nodule                     | TD              | 19.9                                              |
| Schlattingen | 1133.43          | Anhydrite | Nodule                     | TD              | 19.8                                              |
| Schafisheim  | 1234.67          | Anhydrite | Massive bed                | TD              | 18.0                                              |
| Benken       | 748.18           | Anhydrite | Nodule                     | Gipskeuper      | 12.5 <sup>1</sup>                                 |
| Benken       | 766.51           | Anhydrite | Bed                        | Gipskeuper      | 13.8 <sup>1</sup>                                 |
| Böttstein    | 59.37            | Gypsum    | Nodule                     | Gipskeuper      | 14.3 <sup>2</sup>                                 |
| Böttstein    | 59.00            | Gypsum    | Satin spar                 | Gipskeuper      | 14.0 <sup>2</sup>                                 |
| Böttstein    | 80.00            | Gypsum    | Satin spar                 | Gipskeuper      | 14.0 <sup>2</sup>                                 |
| Böttstein    | 88.90            | Anhydrite | Pseudom. after satin spar  | Gipskeuper      | 15.0 <sup>2</sup>                                 |
| Böttstein    | 115.50           | Gypsum    | Interlayered with dolomite | Gipskeuper      | 15.9 <sup>2</sup>                                 |
| Schafisheim  | 1189.60          | Anhydrite | Bed                        | Gipskeuper      | 14.4                                              |
| Schafisheim  | 1207.30          | Anhydrite | Bed                        | Gipskeuper      | 14.9                                              |
| Schafisheim  | 1334.99          | Anhydrite | Fracture-filling           | HMK             | 18.9                                              |
| Schafisheim  | 1329.20          | Anhydrite | Fracture-filling           | HMK             | 17.7 <sup>2</sup>                                 |
| Böttstein    | 158.23           | Anhydrite | Pore-filling               | HMK             | 19.8 <sup>2</sup>                                 |
| Schlattingen | 1116.66          | Anhydrite | Fracture-filling           | TD              | 18.8                                              |
| Schlattingen | 1135.58          | Anhydrite | Pore-filling               | TD              | 20.2                                              |
| Schlattingen | 1136.98          | Anhydrite | Pore-filling               | TD              | 20.4                                              |
| Schlattingen | 1135.29          | Anhydrite | Pore-filling               | TD              | 17.5                                              |
| Schlattingen | 1140.15          | Anhydrite | Pore-filling               | TD              | 17.3                                              |
| Schafisheim  | 1231.47          | Anhydrite | Pore-filling               | TD              | 17.8                                              |
| Schafisheim  | 1234.38          | Anhydrite | Pore-filling               | TD              | 17.6                                              |
| Schafisheim  | 1228.45          | Anhydrite | Fracture-filling           | TD              | 18.3                                              |
| Schafisheim  | 1230.09          | Anhydrite | Pore-filling               | TD              | 17.3                                              |
| Berlingen    | 2184.87          | Anhydrite | Fracture-filling           | TD              | 17.8                                              |
| Berlingen    | 2182.08          | Anhydrite | Fracture-filling           | TD              | 18.6                                              |
| Schlattingen | 1116.66          | Anhydrite | Fracture-filling           | TD              | 19.5                                              |
| Schlattingen | 1136.98          | Anhydrite | Pore-filling               | TD              | 19.2                                              |
| Benken       | 771.51           | Anhydrite | Fracture-filling           | Keuper          | 14.4 <sup>1</sup>                                 |
| Benken       | 730.76           | Anhydrite | Fracture-filling           | Keuper          | 13.5 <sup>1</sup>                                 |

TD: Trigonodus Dolomit

HMK: Hauptmuschelkalk

DAG: Dolomit der Anhydritgruppe

<sup>1</sup> Nagra [38]

<sup>2</sup> Pearson et al. [20]

# A7

Table A.7: Results of the LA-ICP-MS analyses of secondary calcites from the wells at Benken, Schlattingen, Siblingen and Leuggern.

| Sample/<br>Spot         | U<br>(ppm) | <sup>206</sup> Pb<br>(ppm) | Th/U | <sup>207</sup> Pb/ <sup>235</sup> U | 1σ    | <sup>206</sup> Pb/ <sup>238</sup> U | 1σ     | Err.<br>correl. | Model age<br>(Ma) | 1σ | <sup>207</sup> Pb/ <sup>235</sup> U<br>Age (Ma) | 1σ | <sup>206</sup> Pb/ <sup>238</sup> U | 1σ |
|-------------------------|------------|----------------------------|------|-------------------------------------|-------|-------------------------------------|--------|-----------------|-------------------|----|-------------------------------------------------|----|-------------------------------------|----|
| <b>BEN839.81</b>        |            |                            |      |                                     |       |                                     |        |                 |                   |    |                                                 |    |                                     |    |
| <b>NIST612 - 213 nm</b> |            |                            |      |                                     |       |                                     |        |                 |                   |    |                                                 |    |                                     |    |
| BEN839-1                | 0.061      | .                          | 0.1  | 0.150235                            | 0.088 | 0.00534                             | 0.0011 | 0.36702         | 27                | 8  | 34                                              | 7  | 142                                 | 75 |
| BEN839-2                | 0.274      | 0.002                      | 0.11 | 0.598128                            | 0.092 | 0.00548                             | 0.0005 | 0.54445         | 2                 | 4  | 35                                              | 3  | 476                                 | 57 |
| BEN839-12               | 0.758      | 0.007                      | 0.02 | 0.610677                            | 0.043 | 0.00865                             | 0.0003 | 0.49423         | 23                | 2  | 56                                              | 2  | 484                                 | 27 |
| BEN839-3                | 0.215      | 0.002                      | 0.13 | 0.82216                             | 0.106 | 0.01002                             | 0.0007 | 0.51546         | 19                | 6  | 64                                              | 4  | 609                                 | 58 |
| BEN839-14               | 0.656      | 0.009                      | 0.02 | 1.286619                            | 0.071 | 0.01305                             | 0.0004 | 0.54032         | 12                | 4  | 84                                              | 2  | 840                                 | 31 |
| BEN839-23               | 0.702      | 0.009                      | 0.04 | 1.277292                            | 0.089 | 0.0133                              | 0.0005 | 0.53919         | 15                | 4  | 85                                              | 3  | 836                                 | 39 |
| BEN839-8                | 0.385      | 0.005                      | 0.03 | 1.383389                            | 0.099 | 0.01422                             | 0.0006 | 0.54044         | 15                | 5  | 91                                              | 4  | 882                                 | 42 |
| BEN839-13               | 0.617      | 0.01                       | 0.02 | 1.670032                            | 0.087 | 0.01622                             | 0.0005 | 0.54882         | 11                | 4  | 104                                             | 3  | 997                                 | 33 |
| BEN839-15               | 0.639      | 0.01                       | 0.02 | 1.640584                            | 0.081 | 0.0164                              | 0.0004 | 0.54564         | 14                | 4  | 105                                             | 3  | 986                                 | 31 |
| BEN839-18               | 0.696      | 0.013                      | 0.02 | 1.651514                            | 0.076 | 0.0186                              | 0.0005 | 0.53468         | 28                | 4  | 119                                             | 3  | 990                                 | 29 |
| BEN839-21               | 0.447      | 0.009                      | 0.03 | 1.918666                            | 0.129 | 0.01944                             | 0.0007 | 0.54913         | 18                | 6  | 124                                             | 5  | 1088                                | 44 |
| BEN839-5                | 0.072      | 0.002                      | 0.03 | 2.423535                            | 0.31  | 0.02563                             | 0.0018 | 0.54882         | 30                | 16 | 163                                             | 11 | 1250                                | 89 |
| BEN839-22               | 0.679      | 0.018                      | 0.02 | 2.775678                            | 0.111 | 0.02648                             | 0.0006 | 0.56348         | 15                | 5  | 168                                             | 4  | 1349                                | 30 |
| BEN839-16               | 0.434      | 0.015                      | 0.03 | 3.494894                            | 0.24  | 0.03506                             | 0.0014 | 0.5638          | 31                | 12 | 222                                             | 8  | 1526                                | 53 |
| BEN839-19               | 0.668      | 0.025                      | 0.02 | 4.106037                            | 0.141 | 0.03806                             | 0.0008 | 0.57753         | 15                | 7  | 241                                             | 5  | 1656                                | 28 |
| BEN839-10               | 0.836      | 0.039                      | 0.04 | 4.932833                            | 0.132 | 0.04634                             | 0.0007 | 0.58373         | 22                | 6  | 292                                             | 4  | 1808                                | 22 |
| BEN839-4                | 0.178      | 0.009                      | 0.1  | 5.811576                            | 0.356 | 0.05301                             | 0.0019 | 0.59152         | 15                | 17 | 333                                             | 12 | 1948                                | 52 |
| BEN839-9                | 0.715      | 0.045                      | 0.02 | 7.09993                             | 0.161 | 0.06263                             | 0.0009 | 0.6049          | 4                 | 7  | 392                                             | 5  | 2124                                | 20 |
| BEN839-24               | 0.556      | 0.035                      | 0.03 | 6.777602                            | 0.199 | 0.06264                             | 0.0011 | 0.60059         | 23                | 9  | 392                                             | 7  | 2083                                | 26 |
| BEN839-17               | 0.484      | 0.047                      | 0.02 | 10.80853                            | 0.276 | 0.09673                             | 0.0016 | 0.62907         | 16                | 13 | 595                                             | 9  | 2507                                | 24 |
| BEN839-20               | 0.671      | 0.08                       | 0.02 | 12.94146                            | 0.267 | 0.11919                             | 0.0016 | 0.64303         | 42                | 12 | 726                                             | 9  | 2675                                | 19 |
| BEN839-11               | 0.53       | 0.082                      | 0.08 | 17.25825                            | 0.445 | 0.15401                             | 0.0026 | 0.6664          | 22                | 20 | 923                                             | 15 | 2949                                | 25 |
| BEN839-7                | 0.405      | 0.081                      | 0.02 | 22.75651                            | 0.5   | 0.20003                             | 0.003  | 0.69217         | 8                 | 20 | 1175                                            | 16 | 3217                                | 21 |
| BEN839-6                | 0.165      | 0.09                       | 0.03 | 61.4615                             | 1.368 | 0.54715                             | 0.0097 | 0.79866         | 69                | 49 | 2813                                            | 40 | 4198                                | 22 |

Continuation of Table A.7

| Sample/<br>Spot         | U<br>(ppm) | <sup>206</sup> Pb<br>(ppm) | Th/U | <sup>207</sup> Pb/ <sup>235</sup> U | 1σ    | <sup>206</sup> Pb/ <sup>238</sup> U | 1σ     | Err.<br>correl. | Model age<br>(Ma) | 1σ | <sup>207</sup> Pb/ <sup>235</sup> U<br>Age (Ma) | 1σ | <sup>206</sup> Pb/ <sup>238</sup> U | 1σ  |
|-------------------------|------------|----------------------------|------|-------------------------------------|-------|-------------------------------------|--------|-----------------|-------------------|----|-------------------------------------------------|----|-------------------------------------|-----|
| <b>BEN840.10</b>        |            |                            |      |                                     |       |                                     |        |                 |                   |    |                                                 |    |                                     |     |
| <b>NIST612 - 213 nm</b> |            |                            |      |                                     |       |                                     |        |                 |                   |    |                                                 |    |                                     |     |
| BEN840-10               | 0.618      | 0.005                      | 0.06 | 0.577                               | 0.050 | 0.0084                              | 0.0004 | 0.4907          | 23                | 3  | 54                                              | 2  | 462                                 | 32  |
| BEN840-9.2              | 0.136      | 0.001                      | 0.10 | 0.641                               | 0.047 | 0.0085                              | 0.0003 | 0.5033          | 20                | 3  | 55                                              | 2  | 503                                 | 29  |
| BEN840-11.2             | 0.179      | 0.002                      | 0.07 | 0.753                               | 0.047 | 0.0085                              | 0.0003 | 0.5237          | 13                | 2  | 54                                              | 2  | 570                                 | 27  |
| BEN840-10.2             | 0.122      | 0.001                      | 0.07 | 0.950                               | 0.057 | 0.0108                              | 0.0003 | 0.5251          | 17                | 3  | 69                                              | 2  | 678                                 | 29  |
| BEN840-11.3             | 0.121      | 0.001                      | 0.07 | 0.991                               | 0.059 | 0.0106                              | 0.0003 | 0.5326          | 13                | 3  | 68                                              | 2  | 699                                 | 30  |
| BEN840-11.4             | 0.185      | 0.002                      | 0.13 | 1.140                               | 0.062 | 0.0123                              | 0.0004 | 0.5333          | 16                | 3  | 79                                              | 2  | 773                                 | 29  |
| BEN840-10.5             | 0.13       | 0.002                      | 0.06 | 1.227                               | 0.066 | 0.0123                              | 0.0004 | 0.5423          | 10                | 3  | 79                                              | 2  | 813                                 | 30  |
| BEN840-11               | 0.701      | 0.010                      | 0.07 | 1.412                               | 0.078 | 0.0145                              | 0.0004 | 0.5404          | 15                | 4  | 93                                              | 3  | 894                                 | 32  |
| BEN840-10.3             | 0.116      | 0.002                      | 0.07 | 1.851                               | 0.093 | 0.0189                              | 0.0005 | 0.5470          | 18                | 5  | 121                                             | 3  | 1064                                | 33  |
| BEN840-9                | 0.508      | 0.012                      | 0.13 | 2.301                               | 0.114 | 0.0233                              | 0.0006 | 0.5507          | 22                | 6  | 149                                             | 4  | 1213                                | 35  |
| BEN840-12               | 0.514      | 0.012                      | 0.02 | 2.555                               | 0.143 | 0.0243                              | 0.0008 | 0.5596          | 14                | 7  | 155                                             | 5  | 1288                                | 40  |
| BEN840-11.5             | 0.131      | 0.004                      | 0.04 | 2.643                               | 0.102 | 0.0271                              | 0.0006 | 0.5554          | 27                | 5  | 172                                             | 4  | 1313                                | 28  |
| BEN840-10.4             | 0.137      | 0.004                      | 0.05 | 2.664                               | 0.100 | 0.0262                              | 0.0005 | 0.5588          | 20                | 5  | 167                                             | 3  | 1319                                | 27  |
| BEN840-9.3              | 0.074      | 0.002                      | 0.13 | 3.200                               | 0.166 | 0.0319                              | 0.0009 | 0.5626          | 27                | 8  | 202                                             | 6  | 1457                                | 39  |
| BEN840-6                | 0.055      | 0.002                      | 0.04 | 4.358                               | 0.596 | 0.0410                              | 0.0032 | 0.5754          | 20                | 28 | 259                                             | 20 | 1704                                | 109 |
| BEN840-7                | 0.205      | 0.009                      | 0.02 | 4.644                               | 0.306 | 0.0423                              | 0.0016 | 0.5803          | 12                | 14 | 267                                             | 10 | 1757                                | 54  |
| BEN840-4                | 0.174      | 0.010                      | 0.02 | 6.689                               | 0.353 | 0.0600                              | 0.0019 | 0.5965          | 11                | 16 | 376                                             | 11 | 2071                                | 46  |
| BEN840-8                | 0.785      | 0.087                      | 0.01 | 12.664                              | 0.257 | 0.1105                              | 0.0014 | 0.6379          | -1                | 10 | 675                                             | 8  | 2655                                | 19  |
| BEN840-5                | 0.354      | 0.046                      | 0.04 | 14.028                              | 0.353 | 0.1308                              | 0.0021 | 0.6429          | 56                | 16 | 793                                             | 12 | 2752                                | 24  |
| <b>BEN853.92</b>        |            |                            |      |                                     |       |                                     |        |                 |                   |    |                                                 |    |                                     |     |
| <b>NIST612 - 193 nm</b> |            |                            |      |                                     |       |                                     |        |                 |                   |    |                                                 |    |                                     |     |
| BEN853.82-12-24         | 2.136      | 0.004                      | 0.06 | 0.019                               | 0.006 | 0.0019                              | 0.0001 | 0.2108          | 12                | 1  | 12                                              | 1  | 19                                  | 6   |
| BEN853.82-12-26         | 2.208      | 0.005                      | 0.07 | 0.023                               | 0.007 | 0.0021                              | 0.0001 | 0.2201          | 13                | 1  | 13                                              | 1  | 23                                  | 7   |
| BEN853.82-12-23         | 1.648      | 0.004                      | 0.06 | 0.024                               | 0.008 | 0.0022                              | 0.0002 | 0.2173          | 14                | 1  | 14                                              | 1  | 24                                  | 8   |
| BEN853.82-12-20         | 1.941      | 0.004                      | 0.06 | 0.030                               | 0.009 | 0.0018                              | 0.0001 | 0.2619          | 11                | 1  | 12                                              | 1  | 30                                  | 9   |

Continuation of Table A.7

| Sample/<br>Spot         | U<br>(ppm) | <sup>206</sup> Pb<br>(ppm) | Th/U | <sup>207</sup> Pb/ <sup>235</sup> U | 1σ    | <sup>206</sup> Pb/ <sup>238</sup> U | 1σ     | Err.<br>correl. | Model age<br>(Ma) | 1σ | <sup>207</sup> Pb/ <sup>235</sup> U<br>Age (Ma) | 1σ | <sup>206</sup> Pb/ <sup>238</sup> U | 1σ |
|-------------------------|------------|----------------------------|------|-------------------------------------|-------|-------------------------------------|--------|-----------------|-------------------|----|-------------------------------------------------|----|-------------------------------------|----|
| BEN853.82-12-21         | 2.649      | 0.005                      | 0.06 | 0.033                               | 0.008 | 0.0019                              | 0.0001 | 0.2697          | 11                | 1  | 12                                              | 1  | 33                                  | 8  |
| BEN853.82-12-28         | 1.518      | 0.003                      | 0.07 | 0.037                               | 0.011 | 0.0019                              | 0.0002 | 0.2796          | 11                | 1  | 12                                              | 1  | 36                                  | 11 |
| BEN853.82-12-30         | 2.021      | 0.005                      | 0.07 | 0.036                               | 0.009 | 0.0022                              | 0.0001 | 0.2588          | 13                | 1  | 14                                              | 1  | 36                                  | 9  |
| BEN853.82-12-19         | 1.726      | 0.004                      | 0.06 | 0.041                               | 0.011 | 0.0021                              | 0.0002 | 0.2806          | 12                | 1  | 14                                              | 1  | 40                                  | 11 |
| BEN853.82-12-22         | 2.054      | 0.004                      | 0.06 | 0.040                               | 0.010 | 0.0019                              | 0.0001 | 0.2886          | 11                | 1  | 12                                              | 1  | 40                                  | 9  |
| BEN853.82-12-13         | 1.644      | 0.003                      | 0.06 | 0.045                               | 0.013 | 0.0019                              | 0.0002 | 0.3060          | 10                | 1  | 12                                              | 1  | 45                                  | 12 |
| BEN853.82-12-5          | 1.963      | 0.004                      | 0.07 | 0.046                               | 0.011 | 0.0021                              | 0.0001 | 0.2948          | 12                | 1  | 14                                              | 1  | 46                                  | 11 |
| BEN853.82-12-4          | 1.324      | 0.003                      | 0.07 | 0.049                               | 0.014 | 0.0022                              | 0.0002 | 0.2990          | 12                | 1  | 14                                              | 1  | 49                                  | 14 |
| BEN853.82-12-25         | 1.8        | 0.004                      | 0.07 | 0.054                               | 0.012 | 0.0025                              | 0.0002 | 0.2962          | 14                | 1  | 16                                              | 1  | 53                                  | 12 |
| BEN853.82-12-14         | 1.069      | 0.003                      | 0.07 | 0.058                               | 0.018 | 0.0026                              | 0.0002 | 0.3001          | 14                | 2  | 16                                              | 2  | 57                                  | 17 |
| BEN853.82-12-15         | 1.534      | 0.003                      | 0.06 | 0.062                               | 0.014 | 0.0021                              | 0.0002 | 0.3333          | 11                | 1  | 14                                              | 1  | 61                                  | 14 |
| BEN853.82-12-29         | 1.703      | 0.003                      | 0.07 | 0.063                               | 0.015 | 0.0019                              | 0.0002 | 0.3518          | 9                 | 1  | 12                                              | 1  | 62                                  | 15 |
| BEN853.82-12-1          | 1.669      | 0.004                      | 0.07 | 0.073                               | 0.015 | 0.0022                              | 0.0002 | 0.3483          | 11                | 1  | 14                                              | 1  | 71                                  | 14 |
| BEN853.82-12-16         | 1.567      | 0.004                      | 0.06 | 0.087                               | 0.017 | 0.0026                              | 0.0002 | 0.3511          | 12                | 1  | 17                                              | 1  | 85                                  | 16 |
| BEN853.82-12-17         | 1.201      | 0.003                      | 0.07 | 0.090                               | 0.021 | 0.0022                              | 0.0002 | 0.3772          | 10                | 1  | 14                                              | 1  | 88                                  | 19 |
| BEN853.82-12-27         | 0.764      | 0.002                      | 0.07 | 0.125                               | 0.033 | 0.0026                              | 0.0003 | 0.4013          | 10                | 2  | 16                                              | 2  | 119                                 | 29 |
| BEN853.82-12-3          | 0.985      | 0.004                      | 0.18 | 0.177                               | 0.047 | 0.0036                              | 0.0004 | 0.4040          | 14                | 3  | 23                                              | 2  | 166                                 | 40 |
| BEN853.82-12-18         | 1.155      | 0.004                      | 0.10 | 0.239                               | 0.044 | 0.0033                              | 0.0003 | 0.4532          | 9                 | 2  | 21                                              | 2  | 218                                 | 36 |
| BEN853.82-12-8          | 2.172      | 0.035                      | 0.14 | 1.602                               | 0.094 | 0.0159                              | 0.0005 | 0.5029          | 13                | 5  | 102                                             | 3  | 971                                 | 36 |
| BEN853.82-12-2          | 2.094      | 0.130                      | 0.10 | 6.704                               | 0.193 | 0.0621                              | 0.0009 | 0.5290          | 24                | 10 | 388                                             | 6  | 2073                                | 25 |
| BEN853.82-12-6          | 1.731      | 0.114                      | 0.08 | 7.273                               | 0.194 | 0.0660                              | 0.0009 | 0.5331          | 17                | 10 | 412                                             | 6  | 2145                                | 24 |
| <b>LEU54.78</b>         |            |                            |      |                                     |       |                                     |        |                 |                   |    |                                                 |    |                                     |    |
| <b>NIST612 - 213 nm</b> |            |                            |      |                                     |       |                                     |        |                 |                   |    |                                                 |    |                                     |    |
| LEU54_78-13.5           | 3.454      | 0.012                      | 0.00 | 0.156                               | 0.011 | 0.0035                              | 0.0001 | 0.4315          | 14                | 1  | 22                                              | 1  | 147                                 | 10 |
| LEU54_78-3.2            | 2.277      | 0.008                      | 0.00 | 0.162                               | 0.009 | 0.0034                              | 0.0001 | 0.4376          | 14                | 1  | 22                                              | 1  | 153                                 | 8  |
| LEU54_78-13.1           | 5.488      | 0.023                      | 0.00 | 0.256                               | 0.010 | 0.0041                              | 0.0001 | 0.4761          | 13                | 1  | 26                                              | 0  | 231                                 | 8  |
| LEU54_78-3.1            | 3.679      | 0.017                      | 0.00 | 0.319                               | 0.012 | 0.0045                              | 0.0001 | 0.4925          | 12                | 1  | 29                                              | 1  | 281                                 | 10 |

Continuation of Table A.7

| Sample/<br>Spot         | U<br>(ppm) | <sup>206</sup> Pb<br>(ppm) | Th/U | <sup>207</sup> Pb/ <sup>235</sup> U | 1σ    | <sup>206</sup> Pb/ <sup>238</sup> U | 1σ     | Err.<br>correl. | Model age<br>(Ma) | 1σ | <sup>207</sup> Pb/ <sup>235</sup> U<br>Age (Ma) | 1σ | <sup>206</sup> Pb/ <sup>238</sup> U | 1σ |
|-------------------------|------------|----------------------------|------|-------------------------------------|-------|-------------------------------------|--------|-----------------|-------------------|----|-------------------------------------------------|----|-------------------------------------|----|
| LEU54_78-3.9            | 2.135      | 0.012                      | 0.00 | 0.370                               | 0.018 | 0.0055                              | 0.0001 | 0.4871          | 16                | 1  | 36                                              | 1  | 320                                 | 13 |
| LEU54_78-3.8            | 3.228      | 0.018                      | 0.00 | 0.408                               | 0.013 | 0.0056                              | 0.0001 | 0.4992          | 14                | 1  | 36                                              | 1  | 347                                 | 9  |
| LEU54_78-13.2           | 2.459      | 0.015                      | 0.00 | 0.439                               | 0.021 | 0.0060                              | 0.0001 | 0.4984          | 15                | 1  | 39                                              | 1  | 370                                 | 15 |
| LEU54_78-3.7            | 2.384      | 0.016                      | 0.00 | 0.543                               | 0.019 | 0.0065                              | 0.0001 | 0.5165          | 12                | 1  | 42                                              | 1  | 441                                 | 13 |
| LEU54_78-13.4           | 4.114      | 0.029                      | 0.00 | 0.548                               | 0.016 | 0.0071                              | 0.0001 | 0.5083          | 15                | 1  | 45                                              | 1  | 443                                 | 10 |
| LEU54_78-13.3           | 5.076      | 0.037                      | 0.00 | 0.586                               | 0.015 | 0.0073                              | 0.0001 | 0.5135          | 15                | 1  | 47                                              | 1  | 468                                 | 9  |
| LEU54_78-3.3            | 3.176      | 0.035                      | 0.00 | 1.023                               | 0.024 | 0.0109                              | 0.0001 | 0.5362          | 13                | 1  | 70                                              | 1  | 716                                 | 12 |
| LEU54_78-13.12          | 0.449      | 0.007                      | 0.00 | 1.510                               | 0.118 | 0.0147                              | 0.0006 | 0.5500          | 10                | 6  | 94                                              | 4  | 935                                 | 47 |
| <b>SIB241.60</b>        |            |                            |      |                                     |       |                                     |        |                 |                   |    |                                                 |    |                                     |    |
| <b>NIST612 - 213 nm</b> |            |                            |      |                                     |       |                                     |        |                 |                   |    |                                                 |    |                                     |    |
| SIB241-9                | 3.161      | 0.010                      | 0.01 | 0.075655                            | 0.008 | 0.0031                              | 0.0001 | 0.3465          | 17                | 1  | 20                                              | 1  | 74                                  | 7  |
| SIB241-10               | 3.743      | 0.012                      | 0.01 | 0.083846                            | 0.007 | 0.0032                              | 0.0001 | 0.3579          | 17                | 1  | 20                                              | 1  | 82                                  | 7  |
| SIB241-10.4             | 3.845      | 0.012                      | 0.02 | 0.08878                             | 0.005 | 0.0032                              | 0.0001 | 0.3639          | 16                | 0  | 21                                              | 0  | 86                                  | 5  |
| SIB241-10.6             | 5.976      | 0.019                      | 0.01 | 0.092028                            | 0.004 | 0.0032                              | 0.0000 | 0.3675          | 17                | 0  | 21                                              | 0  | 89                                  | 3  |
| SIB241-10.5.3           | 4.342      | 0.020                      | 0.02 | 0.216338                            | 0.008 | 0.0046                              | 0.0001 | 0.4384          | 18                | 1  | 29                                              | 0  | 199                                 | 7  |
| SIB241-10.5.2           | 1.474      | 0.008                      | 0.02 | 0.252873                            | 0.013 | 0.0053                              | 0.0001 | 0.4399          | 21                | 1  | 34                                              | 1  | 229                                 | 11 |
| SIB241-10.5.4           | 0.867      | 0.005                      | 0.04 | 0.305951                            | 0.021 | 0.0061                              | 0.0002 | 0.4477          | 23                | 1  | 39                                              | 1  | 271                                 | 16 |
| SIB241-8                | 1.022      | 0.006                      | 0.03 | 0.443213                            | 0.03  | 0.0063                              | 0.0002 | 0.4929          | 16                | 2  | 40                                              | 1  | 373                                 | 21 |
| SIB241-10.3             | 0.832      | 0.005                      | 0.03 | 0.401069                            | 0.028 | 0.0065                              | 0.0002 | 0.4759          | 20                | 2  | 42                                              | 1  | 342                                 | 20 |
| SIB241-6                | 0.496      | 0.003                      | 0.03 | 0.439921                            | 0.045 | 0.0067                              | 0.0003 | 0.4833          | 20                | 3  | 43                                              | 2  | 370                                 | 31 |
| SIB241-2                | 0.548      | 0.005                      | 0.09 | 0.605894                            | 0.058 | 0.0088                              | 0.0004 | 0.4918          | 24                | 3  | 56                                              | 3  | 481                                 | 36 |
| SIB241-10.5             | 0.984      | 0.013                      | 0.04 | 1.023652                            | 0.042 | 0.0130                              | 0.0003 | 0.5137          | 28                | 2  | 83                                              | 2  | 716                                 | 21 |
| SIB241-5                | 0.415      | 0.007                      | 0.04 | 1.332638                            | 0.164 | 0.0170                              | 0.0011 | 0.5165          | 36                | 9  | 109                                             | 7  | 860                                 | 70 |
| SIB241-10.2             | 0.523      | 0.010                      | 0.03 | 1.66538                             | 0.068 | 0.0198                              | 0.0004 | 0.5289          | 36                | 4  | 126                                             | 3  | 995                                 | 26 |
| SIB241-3                | 0.595      | 0.017                      | 0.16 | 2.691173                            | 0.115 | 0.0287                              | 0.0007 | 0.5491          | 36                | 6  | 183                                             | 4  | 1326                                | 31 |

Continuation of Table A.7

| Sample/<br>Spot         | U<br>(ppm) | <sup>206</sup> Pb<br>(ppm) | Th/U | <sup>207</sup> Pb/ <sup>235</sup> U | 1σ    | <sup>206</sup> Pb/ <sup>238</sup> U | 1σ     | Err.<br>correl. | Model age<br>(Ma) | 1σ | <sup>207</sup> Pb/ <sup>235</sup> U<br>Age (Ma) | 1σ | <sup>206</sup> Pb/ <sup>238</sup> U | 1σ |
|-------------------------|------------|----------------------------|------|-------------------------------------|-------|-------------------------------------|--------|-----------------|-------------------|----|-------------------------------------------------|----|-------------------------------------|----|
| <b>SIB630.02</b>        |            |                            |      |                                     |       |                                     |        |                 |                   |    |                                                 |    |                                     |    |
| <b>NIST612 - 213 nm</b> |            |                            |      |                                     |       |                                     |        |                 |                   |    |                                                 |    |                                     |    |
| SIB630-11               | 22.82      | 1.168                      | 0.80 | 5.342254                            | 0.021 | 0.0512                              | 0.0001 | 0.6008          | 31                | 1  | 322                                             | 1  | 1876                                | 3  |
| SIB630-13               | 43.45      | 2.329                      | 0.59 | 5.551641                            | 0.031 | 0.0536                              | 0.0002 | 0.5952          | 35                | 1  | 337                                             | 1  | 1909                                | 5  |
| SIB630-5.3              | 6.71       | 0.423                      | 0.05 | 6.563168                            | 0.062 | 0.0630                              | 0.0004 | 0.5998          | 38                | 3  | 394                                             | 2  | 2054                                | 8  |
| SIB630-15               | 14.67      | 1.216                      | 0.50 | 8.603445                            | 0.057 | 0.0829                              | 0.0003 | 0.6182          | 53                | 3  | 514                                             | 2  | 2297                                | 6  |
| SIB630-12               | 17.56      | 1.467                      | 0.17 | 8.859905                            | 0.054 | 0.0835                              | 0.0003 | 0.6201          | 41                | 2  | 517                                             | 2  | 2324                                | 6  |
| SIB630-5                | 19.36      | 1.688                      | 0.02 | 9.128006                            | 0.042 | 0.0872                              | 0.0003 | 0.6269          | 51                | 2  | 539                                             | 2  | 2351                                | 4  |
| SIB630-5.2              | 22.60      | 2.143                      | 0.02 | 9.922489                            | 0.041 | 0.0948                              | 0.0002 | 0.6318          | 55                | 2  | 584                                             | 1  | 2428                                | 4  |
| SIB630-14.2             | 20.34      | 2.210                      | 0.12 | 11.74599                            | 0.07  | 0.1086                              | 0.0004 | 0.6408          | 41                | 3  | 665                                             | 2  | 2584                                | 6  |
| SIB630-15.2             | 2.33       | 0.679                      | 0.55 | 31.69403                            | 0.289 | 0.2918                              | 0.0019 | 0.7323          | 101               | 12 | 1651                                            | 10 | 3541                                | 9  |
| SIB630-14               | 11.15      | 3.297                      | 0.26 | 32.04601                            | 0.101 | 0.2957                              | 0.0007 | 0.7298          | 107               | 4  | 1670                                            | 3  | 3552                                | 3  |
| SIB630-11.2             | 2.91       | 1.049                      | 0.54 | 38.00044                            | 0.198 | 0.3608                              | 0.0014 | 0.7502          | 194               | 8  | 1986                                            | 7  | 3720                                | 5  |
| SIB630-13.2             | 6.47       | 2.439                      | 0.56 | 40.00204                            | 0.195 | 0.3771                              | 0.0014 | 0.7562          | 186               | 7  | 2063                                            | 6  | 3771                                | 5  |
| SIB630-12.2             | 3.84       | 1.639                      | 0.35 | 46.12041                            | 0.272 | 0.4272                              | 0.0019 | 0.7712          | 164               | 10 | 2293                                            | 9  | 3912                                | 6  |
| <b>SIB1023.62</b>       |            |                            |      |                                     |       |                                     |        |                 |                   |    |                                                 |    |                                     |    |
| <b>NIST612 - 213 nm</b> |            |                            |      |                                     |       |                                     |        |                 |                   |    |                                                 |    |                                     |    |
| SIB1023-3.4             | 26.48      | 0.112                      | 0.02 | 0.342512                            | 0.004 | 0.0042                              | 0.0000 | 0.5110          | 8                 | 0  | 27                                              | 0  | 299                                 | 3  |
| SIB1023-7.6             | 23.55      | 0.117                      | 0.02 | 0.425782                            | 0.006 | 0.0050                              | 0.0000 | 0.5190          | 9                 | 0  | 32                                              | 0  | 360                                 | 4  |
| SIB1023-7.1             | 10.82      | 0.079                      | 0.03 | 0.690189                            | 0.012 | 0.0073                              | 0.0001 | 0.5320          | 8                 | 1  | 47                                              | 0  | 533                                 | 7  |
| SIB1023-7.5             | 11.61      | 0.102                      | 0.02 | 0.853614                            | 0.011 | 0.0088                              | 0.0001 | 0.5376          | 9                 | 1  | 57                                              | 0  | 627                                 | 6  |
| SIB1023-3.1             | 16.51      | 0.183                      | 0.02 | 1.100802                            | 0.014 | 0.0111                              | 0.0001 | 0.5424          | 10                | 1  | 71                                              | 0  | 754                                 | 7  |
| SIB1023-7.3             | 6.36       | 0.077                      | 0.03 | 1.255945                            | 0.022 | 0.0121                              | 0.0001 | 0.5470          | 8                 | 1  | 78                                              | 1  | 826                                 | 10 |
| SIB1023-3.2             | 9.38       | 0.129                      | 0.03 | 1.422853                            | 0.028 | 0.0137                              | 0.0001 | 0.5483          | 9                 | 1  | 88                                              | 1  | 899                                 | 12 |
| SIB1023-7.2             | 5.19       | 0.087                      | 0.07 | 1.772464                            | 0.027 | 0.0168                              | 0.0001 | 0.5538          | 9                 | 1  | 108                                             | 1  | 1035                                | 10 |
| SIB1023-7.9             | 3.15       | 0.084                      | 0.08 | 2.886046                            | 0.048 | 0.0266                              | 0.0003 | 0.5677          | 9                 | 2  | 169                                             | 2  | 1378                                | 13 |
| SIB1023-7.8             | 9.92       | 0.266                      | 0.02 | 2.919298                            | 0.025 | 0.0268                              | 0.0001 | 0.5706          | 9                 | 1  | 171                                             | 1  | 1387                                | 7  |

Continuation of Table A.7

| Sample/<br>Spot         | U<br>(ppm) | <sup>206</sup> Pb<br>(ppm) | Th/U | <sup>207</sup> Pb/ <sup>235</sup> U | 1σ    | <sup>206</sup> Pb/ <sup>238</sup> U | 1σ     | Err.<br>correl. | Model age<br>(Ma) | 1σ | <sup>207</sup> Pb/ <sup>235</sup> U<br>Age (Ma) | 1σ | <sup>206</sup> Pb/ <sup>238</sup> U | 1σ  |
|-------------------------|------------|----------------------------|------|-------------------------------------|-------|-------------------------------------|--------|-----------------|-------------------|----|-------------------------------------------------|----|-------------------------------------|-----|
| SIB1023-7.4             | 12.00      | 0.381                      | 0.03 | 3.470085                            | 0.025 | 0.0317                              | 0.0001 | 0.5766          | 10                | 1  | 201                                             | 1  | 1520                                | 6   |
| SIB1023-7.7             | 15.47      | 0.723                      | 0.01 | 5.178799                            | 0.027 | 0.0468                              | 0.0001 | 0.5955          | 10                | 1  | 295                                             | 1  | 1849                                | 4   |
| SIB1023-3.3             | 6.14       | 0.293                      | 0.04 | 5.270473                            | 0.044 | 0.0477                              | 0.0002 | 0.5895          | 11                | 2  | 300                                             | 1  | 1864                                | 7   |
| <b>SLA1167.68</b>       |            |                            |      |                                     |       |                                     |        |                 |                   |    |                                                 |    |                                     |     |
| <b>NIST612 - 213 nm</b> |            |                            |      |                                     |       |                                     |        |                 |                   |    |                                                 |    |                                     |     |
| SLA1167.88-17           | 3.21       | 0.013                      | 0.02 | 0.211021                            | 0.042 | 0.0041                              | 0.0003 | 0.4072          | 16                | 3  | 27                                              | 2  | 194                                 | 34  |
| SLA1167.88-27           | 0.68       | 0.003                      | 0.02 | 0.378038                            | 0.073 | 0.0048                              | 0.0004 | 0.4678          | 10                | 4  | 31                                              | 3  | 326                                 | 53  |
| SLA1167.88-21           | 16.43      | 0.110                      | 0.00 | 0.507156                            | 0.015 | 0.0067                              | 0.0001 | 0.4637          | 15                | 1  | 43                                              | 1  | 417                                 | 10  |
| SLA1167.88-11           | 1.13       | 0.008                      | 0.02 | 0.634542                            | 0.103 | 0.0073                              | 0.0006 | 0.4795          | 12                | 5  | 47                                              | 4  | 499                                 | 63  |
| SLA1167.88-19           | 24.58      | 0.204                      | 0.00 | 0.674926                            | 0.014 | 0.0083                              | 0.0001 | 0.4743          | 16                | 1  | 53                                              | 1  | 524                                 | 9   |
| SLA1167.88-28           | 0.44       | 0.004                      | 0.02 | 0.561043                            | 0.189 | 0.0092                              | 0.0014 | 0.4341          | 30                | 11 | 59                                              | 9  | 452                                 | 118 |
| SLA1167.88-20           | 27.53      | 0.262                      | 0.00 | 0.813315                            | 0.016 | 0.0095                              | 0.0001 | 0.4809          | 16                | 1  | 61                                              | 1  | 604                                 | 9   |
| SLA1167.88-10           | 1.12       | 0.011                      | 0.03 | 0.88036                             | 0.096 | 0.0102                              | 0.0005 | 0.4805          | 17                | 5  | 65                                              | 3  | 641                                 | 51  |
| SLA1167.88-14           | 23.34      | 0.267                      | 0.00 | 1.048773                            | 0.019 | 0.0115                              | 0.0001 | 0.4900          | 16                | 1  | 73                                              | 1  | 728                                 | 9   |
| SLA1167.88-9            | 1.67       | 0.020                      | 0.04 | 1.034136                            | 0.133 | 0.0123                              | 0.0008 | 0.4781          | 22                | 7  | 79                                              | 5  | 721                                 | 65  |
| SLA1167.88-26           | 0.69       | 0.009                      | 0.03 | 1.236749                            | 0.14  | 0.0123                              | 0.0007 | 0.5013          | 10                | 7  | 79                                              | 4  | 817                                 | 62  |
| SLA1167.88-22           | 1.93       | 0.028                      | 0.02 | 1.366415                            | 0.08  | 0.0143                              | 0.0004 | 0.4958          | 16                | 4  | 92                                              | 3  | 875                                 | 34  |
| SLA1167.88-24           | 8.46       | 0.134                      | 0.01 | 1.524356                            | 0.037 | 0.0159                              | 0.0002 | 0.4983          | 17                | 2  | 102                                             | 1  | 940                                 | 15  |
| SLA1167.88-1            | 1.41       | 0.028                      | 0.02 | 2.01848                             | 0.121 | 0.0198                              | 0.0006 | 0.5060          | 15                | 6  | 127                                             | 4  | 1122                                | 40  |
| SLA1167.88-23           | 1.38       | 0.028                      | 0.02 | 1.817404                            | 0.12  | 0.0203                              | 0.0007 | 0.4903          | 30                | 6  | 129                                             | 4  | 1052                                | 43  |
| SLA1167.88-4            | 10.76      | 0.256                      | 0.00 | 2.389494                            | 0.061 | 0.0238                              | 0.0003 | 0.5062          | 20                | 3  | 152                                             | 2  | 1239                                | 18  |
| SLA1167.88-15           | 30.01      | 0.749                      | 0.00 | 2.534718                            | 0.027 | 0.0249                              | 0.0001 | 0.5106          | 19                | 1  | 159                                             | 1  | 1282                                | 8   |
| SLA1167.88-13           | 15.49      | 0.425                      | 0.00 | 2.81209                             | 0.042 | 0.0274                              | 0.0002 | 0.5116          | 19                | 2  | 174                                             | 1  | 1359                                | 11  |
| SLA1167.88-25           | 3.26       | 0.101                      | 0.02 | 3.28592                             | 0.113 | 0.0309                              | 0.0005 | 0.5163          | 15                | 6  | 196                                             | 3  | 1478                                | 27  |
| SLA1167.88-7            | 16.66      | 0.548                      | 0.00 | 3.426384                            | 0.041 | 0.0329                              | 0.0002 | 0.5174          | 20                | 2  | 209                                             | 1  | 1510                                | 9   |
| SLA1167.88-12           | 2.08       | 0.075                      | 0.01 | 3.666293                            | 0.235 | 0.0359                              | 0.0012 | 0.5119          | 26                | 12 | 227                                             | 7  | 1564                                | 50  |
| SLA1167.88-8            | 5.35       | 0.203                      | 0.02 | 3.898581                            | 0.098 | 0.0379                              | 0.0005 | 0.5145          | 26                | 5  | 240                                             | 3  | 1613                                | 20  |

Continuation of Table A.7

| Sample/<br>Spot | U<br>(ppm) | <sup>206</sup> Pb<br>(ppm) | Th/U | <sup>207</sup> Pb/ <sup>235</sup> U | 1σ    | <sup>206</sup> Pb/ <sup>238</sup> U | 1σ     | Err.<br>correl. | Model age<br>(Ma) | 1σ | <sup>207</sup> Pb/ <sup>235</sup> U<br>Age (Ma) | 1σ | <sup>206</sup> Pb/ <sup>238</sup> U | 1σ |
|-----------------|------------|----------------------------|------|-------------------------------------|-------|-------------------------------------|--------|-----------------|-------------------|----|-------------------------------------------------|----|-------------------------------------|----|
| SLA1167.88-6    | 4.03       | 0.163                      | 0.02 | 4.237806                            | 0.104 | 0.0403                              | 0.0005 | 0.5187          | 22                | 5  | 255                                             | 3  | 1681                                | 20 |
| SLA1167.88-18   | 4.80       | 0.234                      | 0.01 | 5.069222                            | 0.124 | 0.0487                              | 0.0006 | 0.5202          | 30                | 6  | 307                                             | 4  | 1831                                | 21 |
| SLA1167.88-16   | 6.13       | 0.645                      | 0.01 | 11.14024                            | 0.178 | 0.1053                              | 0.0009 | 0.5422          | 54                | 9  | 646                                             | 5  | 2535                                | 15 |

## A8

As a consistency test for the favoured scenario in which saline brine in the Muschelkalk dolostones mixes with a dilute fluid ascending from the basement, a simple thermodynamic model has been constructed using the software *PhreeqC* [62]. The brine (composition defined in Table A.8) was assumed to be in equilibrium with dolomite and anhydrite at 50 °C, whereas the dilute fluid (composition of a recent groundwater from the crystalline basement in Wittwer [61]; Table A.8) was assumed to be in equilibrium with calcite but undersaturated with respect to anhydrite at 65 °C.

The results show that mixing will spontaneously result in dissolution of anhydrite (saturation index,  $S.I. < 0$  in Fig. A.8) and precipitation of secondary calcite and dolomite ( $S.I. > 0$  in Fig. A.8) over a wide range of volumetric mixing ratios (supersaturation of dolomite is mainly caused by the large contrast in the calcium and magnesium concentrations of the endmembers). The model is therefore broadly consistent with the observations. However, as both carbonate minerals are supersaturated in this model, it is not clear why calcite precipitates alone in the shallow wells, whereas dolomite precipitates alone in the deep wells. Quartz and kaolinite precipitation on the other hand is probably triggered by cooling of the silica- and alumina-bearing basement water upon its ascent or upon mixing with the colder brine in the dolostones.

Table A.8: Chemical data on evaporative brine [57] and basement water from the Weiach well [61].

| Parameter                            | Brine  | Basement water |
|--------------------------------------|--------|----------------|
| pH                                   | 6.6    | 7.66           |
| Temperature (°C)                     | 50     | 65             |
| Pressure (MPa)                       | 12     | 19             |
| Na <sup>+</sup> (mg/L)               | 82120  | 2205           |
| K <sup>+</sup> (mg/L)                | 4240   | 70.4           |
| Mg <sup>2+</sup> (mg/L)              | 10000  | 0.1            |
| Ca <sup>2+</sup> (mg/L)              | 11250  | 152            |
| Cl <sup>-</sup> (mg/L)               | 176350 | 3382           |
| SO <sub>4</sub> <sup>2-</sup> (mg/L) | 3920   | 431            |
| Alkalinity (mg/L)                    | 56     | 76             |

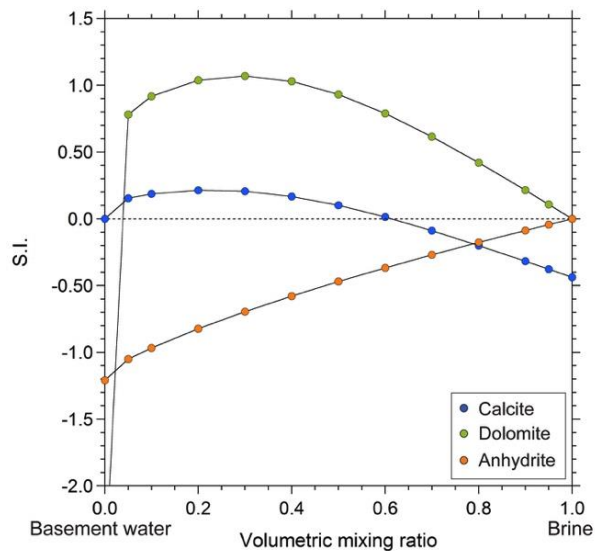

**Fig. A.8.** Saturation indices (*S.I.*) of calcite, dolomite and anhydrite as a function of the volumetric mixing ratio between a hypersaline brine at 50 °C (residual Triassic dolomitizing pore water) and a recent groundwater from the crystalline basement at 65 °C, calculated using PhreeqC and data in Table A.8.

## A9

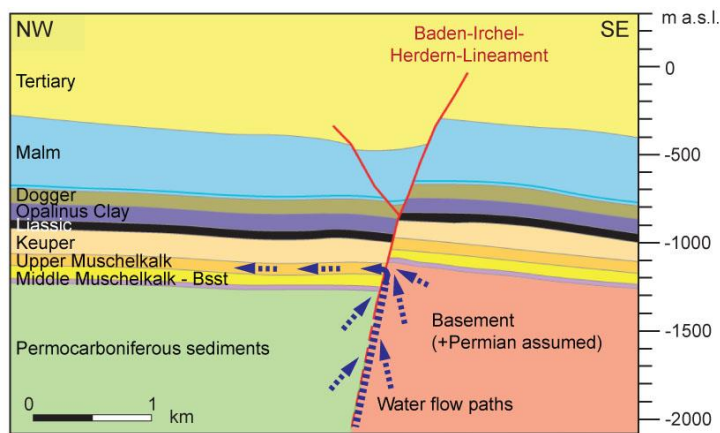

**Fig. A.9.** Deduced infiltration of basement fluid on an interpreted NW–SE seismic transect of the Baden–Irchel–Herdern Lineament, at the margin of a Permo-carboniferous through. The fault has a throw of about 150 m, which juxtaposes the basement and the Upper Muschelkalk. Thus, ascending basement water can bypass the Middle Muschelkalk Sulfatschichten and directly infiltrate the Upper Muschelkalk (Bsst: Buntsandstein; see Fig. 1a to locate the profile; modified after Nagra, 2014).

## References:

- Nagra (2014) SGT Etappe 2: Vorschlag weiter zu untersuchender geologischer Standortgebiete mit zugehörigen Standortarealen für die Oberflächenanlage – Geologische Grundlagen Dossier II; Sedimentologische und tektonische Verhältnisse. Nagra Technischer Bericht NTB 14-02. Nagra, Wettingen, Switzerland.
